# Supplementary material for: A study of the thermodynamics and mechanisms of the atmospherically relevant reaction dimethyl sulphide (DMS) with atomic chlorine (Cl) in the absence and presence of water, using electronic structure methods
Source: Royal Society of Chemistry journal article supplement (doi:10.1039/d2cp05814f), 2023-01-01
Supplement: d2cp05814f1.pdf [file d2cp05814f1.pdf]

## Supplementary Information

for the paper entitled “A study of the thermodynamics and mechanisms of the atmospherically relevant reaction dimethyl sulphide (DMS) + atomic chlorine (Cl) in the absence and presence of water, using electronic structure methods”.

by

Lydia Rhyman, Edmond P. F. Lee, Ponnadurai Ramasami and John M. Dyke

### Contents

(with page no. indicated in Column 3)

|                  |                                                                                                                                                                                                                                                                                             |        |
|------------------|---------------------------------------------------------------------------------------------------------------------------------------------------------------------------------------------------------------------------------------------------------------------------------------------|--------|
| <b>Table S1</b>  | Enthalpy of the Cl + DMS → DMS•Cl reaction (values in kcal.mol <sup>-1</sup> ).                                                                                                                                                                                                             | 3      |
| <b>Table S2</b>  | Computed geometrical parameters of Cl-S(CH <sub>3</sub> ) <sub>2</sub> from refs.(18,22,24,25-27).                                                                                                                                                                                          | 4      |
| <b>Table S3</b>  | Relative electronic energies (including ZPE), thermodynamic parameters computed at different levels and heat of reactions (298 K) computed in this work for the four channels of the DMS + Cl reaction. The values within brackets are those reported by Resende and De Almeida (ref.27).   | 5      |
| <b>Table S4</b>  | DMS + Cl:Relative electronic energies ( $\Delta E$ , kcal.mol <sup>-1</sup> ), relative enthalpies ( $\Delta H_{f,298K}^{\phi}$ , kcal.mol <sup>-1</sup> ) and relative free energies (in italic, $\Delta G_{f,298K}^{\phi}$ , kcal.mol <sup>-1</sup> ) for the possible reaction channels. | 7      |
| <b>Table S5</b>  | DMS + Cl + H <sub>2</sub> O; Relative electronic energies ( $\Delta E$ , kcal.mol <sup>-1</sup> ), relative enthalpies ( $\Delta H_{f,298K}^{\phi}$ , kcal.mol <sup>-1</sup> ) and relative free energies (in italic, $\Delta G_{f,298K}^{\phi}$ , kcal.mol <sup>-1</sup> ) for channel A   | 8      |
| <b>Table S6</b>  | DMS + Cl + H <sub>2</sub> O Relative electronic energies ( $\Delta E$ , kcal.mol <sup>-1</sup> ), relative enthalpies ( $\Delta H_{f,298K}^{\phi}$ , kcal.mol <sup>-1</sup> ) and relative free energies (in italic, $\Delta G_{f,298K}^{\phi}$ , kcal.mol <sup>-1</sup> ) for channel B.   | 1<br>0 |
| <b>Table S7</b>  | Summary of computed TST and TST + Wigner tunneling correction 298K rate coefficients for DMS+Cl+H <sub>2</sub> O reaction, obtained using DLPNO-UCCSD(T)/CBS//UM06-2X/aVTZ relative energies.                                                                                               | 1<br>2 |
| <b>Figure S1</b> | Energy profiles for the reaction of DMS + Cl using the UM06-2X/aVDZ method. The relative electronic energies ( $\Delta E$ ) are reported in kcal.mol <sup>-1</sup> .                                                                                                                        | 1<br>3 |
| <b>Figure S2</b> | UM06-2X/aVDZ optimised geometries of the stationary points shown in Figure S1.                                                                                                                                                                                                              | 1<br>4 |
| <b>Figure S3</b> | UM06-2X/aVTZ optimised geometries of the stationary points RC2, TS2, MS2, CH <sub>3</sub> S, CH <sub>3</sub> Cl, TS3, MS3, CH <sub>3</sub> SCl and CH <sub>3</sub> shown in Figure 1.                                                                                                       | 16     |
| <b>Figure S4</b> | UM06-2X/aVDZ and UM06-2X/aVTZ optimised geometries for DMS•H <sub>2</sub> O, Cl•H <sub>2</sub> O and DMS•Cl.                                                                                                                                                                                | 18     |
|                  | A discussion of the geometrical parameters of the stationary points of the DMS + Cl reaction shown in Figure 2.                                                                                                                                                                             | 20     |
|                  | Comparison of the potential energy profiles obtained in ref.(27) with those                                                                                                                                                                                                                 | 21     |

|  |                                                                                                                                                                                         |    |
|--|-----------------------------------------------------------------------------------------------------------------------------------------------------------------------------------------|----|
|  | obtained in this work.                                                                                                                                                                  |    |
|  | Summary of previous computation work on the DMS + Cl reaction (25,27-30)                                                                                                                | 22 |
|  | Cartesian coordinates for all stationary points for the DMS + Cl using the UM06-2X/aVDZ and UM06-2X/aVTZ methods, with total energies and nuclear repulsion energies                    | 23 |
|  | Cartesian coordinates for all stationary points for the DMS + Cl + H <sub>2</sub> O using the UM06-2X/aVDZ and UM06-2X/aVTZ methods, with total energies and nuclear repulsion energies | 27 |
|  | More detail on comparison of Figure 1 with Figures 4 and 5 (for Channel A) and Figure 1 with Figures 6 and 7 (for Channel B)                                                            | 33 |

**Table S1:** Enthalpy of the  $\text{Cl} + \text{DMS} \rightarrow \text{DMS}\cdot\text{Cl}$  reaction (values in  $\text{kcal}\cdot\text{mol}^{-1}$ ).(this can also be written  $\text{Cl}\bullet + \text{DMS} \rightarrow \text{DMS}\cdot\text{Cl}$ )

| Ref.                                    | $\Delta H^\ddagger(298\text{K})$ | Method                                                                                                                                                                                                                                 | Comments                                                                                                                                                       |
|-----------------------------------------|----------------------------------|----------------------------------------------------------------------------------------------------------------------------------------------------------------------------------------------------------------------------------------|----------------------------------------------------------------------------------------------------------------------------------------------------------------|
| 1. Stickel et al. (1992), ref [21]      | $-14 \pm 3$                      | Adduct bond strength estimated from unpublished studies on $\text{CH}_3\text{S}(\text{X})\text{CH}_3$ where $\text{X} = \text{Br}$ and $\text{OH}$ , where the bond strength was “found to be” $14.0 \text{ kcal}\cdot\text{mol}^{-1}$ | Probably not reliable as the estimated value comes from unpublished material and is not on $\text{CH}_3\text{S}(\text{X})\text{CH}_3$ , $\text{X} = \text{Cl}$ |
| 2. M. L. McKee (1993), ref [30]         | -12.2                            | PMP2/6-31G(d)//3-21G(d)                                                                                                                                                                                                                | The lower level basis set, 3-21G*, is too small                                                                                                                |
| 3. Wilson and Hirst (1997), ref [28]    | -19.4                            | MP2(full)/6-311G(d,p)                                                                                                                                                                                                                  | Reasonably good                                                                                                                                                |
| 4. K.C.Thompson et al. (2002), ref [29] | -23.2                            | B3LYP/6-311++G(2df,p)//B3LYP/6-311++G(d,p)                                                                                                                                                                                             | Reasonably good                                                                                                                                                |
| 5. Resende and Almeida (1997), ref [27] | -12.7                            | UQCISD(T)/DZP//UMP2/DZP                                                                                                                                                                                                                | DZP basis set is too small                                                                                                                                     |
| 6. S. Enami et al. (2004), ref [25]     | -17.7                            | QCISD(T)/6-311++G(3df,3dp)//B3LYP/6-311++G(3df,3pd)                                                                                                                                                                                    | Reasonably good                                                                                                                                                |

## Conclusion

$\Delta H^\ddagger(298\text{K})$  is much closer to  $-23.0 \text{ kcal}\cdot\text{mol}^{-1}$  than  $-14.0 \text{ kcal}\cdot\text{mol}^{-1}$ , as indicated by the calculations of this work (see Table S3).

**Table S2:** Computed geometrical parameters of Cl-S(CH<sub>3</sub>)<sub>2</sub> from refs [21, 25, 27, 28-30].

| Ref<br>(method used)               | S-Cl/Å | ∠C-S-Cl/°  | C-S/° | ∠C-S-C/° |
|------------------------------------|--------|------------|-------|----------|
| [21]                               | no     | parameters | given |          |
| [30]<br>(HF 3-21G(d))              | 2.760  | 94.5       | 1.807 | 100.2    |
| [28]<br>(MP2/6-311G(d,p))          | 2.590  | 91.7       | 1.790 | 99.8     |
| [29]<br>B3LYP/6-<br>311++G(d,p)    | 2.680  | 93.7       | 1.820 | 100.7    |
| [27]<br>UMP2/DZP                   | 2.587  | 91.9       | 1.807 | 99.6     |
| [25]<br>B3LYP/6-<br>311++G(3df,3p) | 2.620  | 93.5       | 1.800 | 101.1    |
| [25]<br>MP2/6-<br>311++G(2df,2p)   | 2.500  | 91.8       | 1.790 | 99.5     |

**Table S3:** Relative electronic energies (including ZPE), thermodynamic parameters computed at different levels and heat of reactions (298 K) computed in this work for the four channels of the DMS + Cl reaction. The values within brackets are those reported by Resende and De Almeida (ref [27]).

|                                                      | Methods                                 | $\Delta E/\text{kcal/mol}$ | $\Delta H/\text{kcal/mol}$ | $\Delta G/\text{kcal/mol}$ | $\Delta S/\text{cal/K}\cdot\text{mol}$ | $\Delta H_{f,298\text{ K}}/\text{kcal/mol}$ |
|------------------------------------------------------|-----------------------------------------|----------------------------|----------------------------|----------------------------|----------------------------------------|---------------------------------------------|
| DMS + Cl<br>→ Adduct 1                               | PUMP2/DZP <sup>a</sup>                  | -13.61<br>-12.62           | -13.01                     | -5.96                      | -23.65                                 | -14 ± 3 <sup>a</sup><br>(ref [27])          |
|                                                      | UQCISD(T)//UMP2/DZP <sup>b</sup>        | -11.00<br>(-12.32)         | -11.39<br>(-12.72)         | -4.34<br>(-5.63)           | -23.65<br>(-23.78)                     |                                             |
|                                                      | PUMP2/aVDZ <sup>a</sup>                 | -21.79<br>-20.83           | -21.24                     | -14.12                     | -23.88                                 |                                             |
|                                                      | UQCISD(T)//UMP2/aVDZ <sup>b</sup>       | -18.04                     | -18.45                     | -11.32                     | -23.91                                 |                                             |
|                                                      | UB3LYP/aVTZ                             | -22.50                     | -22.78                     | -16.07                     | -22.51                                 |                                             |
|                                                      | PUMP2/cc-pVTZ//UB3LYP/aVTZ <sup>c</sup> | -18.81                     | -19.08                     | -12.38                     | -22.47                                 |                                             |
|                                                      | UM06-2X/6-31++G(d,p)                    | -21.28                     | -21.57                     | -14.84                     | -22.57                                 |                                             |
|                                                      | UM06-2X/cc-pVDZ                         | -21.59                     | -21.87                     | -15.14                     | -22.57                                 |                                             |
|                                                      | UQCISD(T)//UM06-2X/cc-pVDZ <sup>b</sup> | -12.01                     | -12.29                     | -5.56                      | -22.57                                 |                                             |
|                                                      | UM06-2X/aVDZ                            | -23.29                     | -23.59                     | -16.84                     | -22.64                                 |                                             |
| UCCSD(T)/CBS//UM06-2X/aVDZ <sup>d</sup>              | -20.78                                  | -21.06                     | -                          | -                          |                                        |                                             |
| DMS + Cl →<br>CH <sub>3</sub> SCH <sub>2</sub> + HCl | PUMP2/DZP                               | 0.84<br>-3.76              | -3.05                      | -5.92                      | 9.63                                   | -9.38 ± 1.49                                |
|                                                      | UQCISD(T)//UMP2/DZP                     | -3.74<br>(-3.19)           | -3.04<br>(-2.50)           | -5.90<br>(-5.33)           | 9.59<br>(9.49)                         |                                             |
|                                                      | PUMP2/aVDZ                              | -2.76<br>-7.18             | -6.46                      | -9.36                      | 9.73                                   |                                             |
|                                                      | UQCISD(T)//UMP2/aVDZ                    | -6.73                      | -6.02                      | -8.91                      | 9.69                                   |                                             |
|                                                      | UB3LYP/aVTZ                             | -10.82                     | -9.98                      | -13.28                     | 11.07                                  |                                             |
|                                                      | PUMP2/cc-pVTZ//UB3LYP/aVTZ              | -8.71                      | -7.87                      | -11.17                     | 11.07                                  |                                             |
|                                                      | UM06-2X/6-31++G(d,p)                    | -5.11                      | -4.38                      | -7.29                      | 9.76                                   |                                             |
|                                                      | UM06-2X/cc-pVDZ                         | -5.83                      | -5.15                      | -7.96                      | 9.42                                   |                                             |
|                                                      | UQCISD(T)//UM06-2X/cc-pVDZ              | -4.28                      | -3.60                      | -6.41                      | 9.42                                   |                                             |
|                                                      | UM06-2X/aVDZ                            | -7.79                      | -7.05                      | -9.98                      | 9.83                                   |                                             |
| UCCSD(T)/CBS//UM06-2X/aVDZ <sup>d</sup>              | -10.53                                  | -9.79                      | -                          | -                          |                                        |                                             |

|                                                      |                            |                       |                  |                    |                  |              |
|------------------------------------------------------|----------------------------|-----------------------|------------------|--------------------|------------------|--------------|
| DMS + Cl<br>→ CH <sub>3</sub> S + CH <sub>3</sub> Cl | PUMP2/DZP                  | -6.35<br><b>-7.66</b> | -7.74            | -10.66             | 9.79             | -10.2 ± 0.76 |
|                                                      | UQCISD(T)//UMP2/DZP        | -7.38<br>(-8.46)      | -7.46<br>(-8.55) | -10.39<br>(-12.13) | 9.83<br>(12.01)  |              |
|                                                      | PUMP2/aVDZ                 | -8.36<br><b>-9.59</b> | -9.67            | -12.62             | 9.89             |              |
|                                                      | UQCISD(T)//UMP2/ aVDZ      | -9.33                 | -9.41            | -12.36             | 9.89             |              |
|                                                      | UB3LYP/aVTZ                | -13.26                | -13.32           | -16.28             | 9.93             |              |
|                                                      | PUMP2/cc-pVTZ//UB3LYP/aVTZ | -8.95                 | -9.02            | -11.98             | 9.93             |              |
|                                                      | UM06-2X/6-31++G(d,p)       | -10.02                | -10.16           | -13.04             | 9.66             |              |
|                                                      | UM06-2X/cc-pVDZ            | -9.68                 | -9.81            | -12.75             | 9.86             |              |
|                                                      | UQCISD(T)//UM06-2X/cc-pVDZ | -7.62                 | -7.74            | -10.68             | 9.86             |              |
| UM06-2X/aVDZ                                         | -10.30                     | -10.44                | -13.36           | 9.79               |                  |              |
| DMS + Cl<br>→ CH <sub>3</sub> SCl + CH <sub>3</sub>  | PUMP2/DZP                  | 21.15<br><b>16.87</b> | 17.56            | 14.33              | 10.83            | 8.05 ± 1.66  |
|                                                      | UQCISD(T)//UMP2/DZP        | 16.28<br>(12.45)      | 20.95<br>(13.12) | 14.28<br>(9.23)    | 22.37<br>(13.05) |              |
|                                                      | PUMP2/aVDZ                 | 15.95<br><b>11.98</b> | 12.65            | 9.40               | 10.90            |              |
|                                                      | UQCISD(T)//UMP2/aVDZ       | 12.03                 | 12.70            | 9.45               | 10.90            |              |
|                                                      | UB3LYP/aVTZ                | 4.81                  | 5.47             | 2.23               | 10.87            |              |
|                                                      | PUMP2/cc-pVTZ//UB3LYP/aVTZ | 8.48                  | 9.14             | 5.90               | 10.87            |              |
|                                                      | UM06-2X/6-31++G(d,p)       | 11.08                 | 11.81            | 8.42               | 11.37            |              |
|                                                      | UM06-2X/cc-pVDZ            | 9.93                  | 10.74            | 7.15               | 12.04            |              |
|                                                      | UQCISD(T)//UM06-2X/cc-pVDZ | 13.58                 | 14.39            | 10.80              | 12.04            |              |
| UM06-2X/aVDZ                                         | 8.37                       | 9.12                  | 5.64             | 11.67              |                  |              |

<sup>a</sup>Based on the PUMP2/DZP method, the thermal corrections for the thermodynamic parameters obtained using the UMP2/DZP method were added to the projected UMP2 energy. Same applies for PUMP2/aVDZ method. **Note also that ZPE is not included in the projected energy for those highlighted in blue.**

<sup>b</sup>Based on the UQCISD(T)//UMP2/DZP and UQCISD(T)//UMP2/aVDZ methods, ZPE obtained at the UMP2/DZP and UMP2/aVDZ methods were added to the UQCISD(T) energy, respectively. Same applies for the UQCISD(T)//UM06-2X/cc-pVDZ method.

<sup>c</sup>Based on the PUMP2/cc-pVTZ//UB3LYP/aVTZ method, the ZPE and thermal corrections obtained using the UB3LYP/aVTZ method were added to the projected UMP2 energies.

<sup>d</sup>The energetic parameters at the UCCSD(T)/aVnZ//UM06-2X/aVDZ (n = D, T and Q) methods were extrapolated to the complete basis set (CBS) limit using the two- and three- parameter formulae. As recommended by Feller's group, the best CBS estimate was taken as the average of these two limits and the spread as an estimate in the uncertainty of the extrapolation procedure. The thermal correction to the enthalpy obtained using the UM06-2X/aVDZ method were added to the UCCSD(T) single point energy.

**Table S4: DMS + Cl:** Relative electronic energies ( $\Delta E$ , kcal.mol<sup>-1</sup>), relative enthalpies (in bracket,  $\Delta H_{f,298K}^\phi$ , kcal.mol<sup>-1</sup>)<sup>a</sup> and relative free energies (in italic,  $\Delta G_{f,298K}^\phi$ , kcal.mol<sup>-1</sup>) for the three possible channels.

|                                        | UM06-2X/aVTZ                     | UCCSD(T)/aVnZ//UM06-2X/aVTZ<br>(n = T and Q) |                                  |                                  | DLPNO-UCCSD(T)/aVnZ//UM06-2X/aVTZ<br>(n = T and Q) |                                  |                                  |
|----------------------------------------|----------------------------------|----------------------------------------------|----------------------------------|----------------------------------|----------------------------------------------------|----------------------------------|----------------------------------|
|                                        |                                  | n = T                                        | n = Q                            | CBS                              | n = T                                              | n = Q                            | CBS                              |
| <b>Channel A</b>                       |                                  |                                              |                                  |                                  |                                                    |                                  |                                  |
| RC1 <sup>b</sup>                       | -10.6<br>(-10.9)<br><i>-4.5</i>  | -6.9<br>(-7.2)<br><i>-0.7</i>                | -7.6<br>(-8.0)<br><i>-1.5</i>    | -8.2<br>(-8.5)<br><i>-2.1</i>    | -6.1<br>(-6.4)<br><i>0.0</i>                       | -6.9<br>(-7.2)<br><i>-0.7</i>    | -7.4<br>(-7.7)<br><i>-1.3</i>    |
| TS1                                    | -11.5<br>(-12.0)<br><i>-5.2</i>  | -8.2<br>(-8.7)<br><i>-1.8</i>                | -9.0<br>(-9.6)<br><i>-2.7</i>    | -9.7<br>(-10.2)<br><i>-3.3</i>   | -7.5<br>(-8.0)<br><i>-1.1</i>                      | -8.3<br>(-8.8)<br><i>-2.0</i>    | -8.9<br>(-9.4)<br><i>-2.6</i>    |
| MS1                                    | -12.9<br>(-12.7)<br><i>-7.6</i>  | -12.4<br>(-12.2)<br><i>-7.1</i>              | -13.5<br>(-13.3)<br><i>-8.2</i>  | -14.4<br>(-14.1)<br><i>-9.1</i>  | -11.8<br>(-)<br><i>11.6</i><br><i>-6.5</i>         | -12.9<br>(-12.7)<br><i>-7.7</i>  | -13.7<br>(-13.5)<br><i>-8.5</i>  |
| CH <sub>3</sub> SCH <sub>2</sub> + HCl | -9.1<br>(-8.2)<br><i>-11.5</i>   | -8.5<br>(-7.7)<br><i>-10.9</i>               | -10.0<br>(-9.2)<br><i>-12.4</i>  | -11.1<br>(-10.2)<br><i>-13.5</i> | -8.1<br>(-7.3)<br><i>-10.5</i>                     | -9.7<br>(-8.8)<br><i>-12.1</i>   | -10.8<br>(-10.0)<br><i>-13.2</i> |
| <b>Channel B</b>                       |                                  |                                              |                                  |                                  |                                                    |                                  |                                  |
| RC2                                    | -0.5<br>(-0.4)<br><i>4.2</i>     | -1.0<br>(-0.8)<br><i>3.9</i>                 | -0.8<br>(-0.7)<br><i>3.9</i>     | -0.8<br>(-0.7)<br><i>4.0</i>     | -0.7<br>(-0.6)<br><i>4.0</i>                       | -0.6<br>(-0.5)<br><i>4.1</i>     | -0.6<br>(-0.5)<br><i>4.2</i>     |
| TS2                                    | 15.5<br>(15.4)<br><i>20.8</i>    | 17.7<br>(17.6)<br><i>22.9</i>                | 17.9<br>(17.8)<br><i>23.1</i>    | 18.0<br>(17.9)<br><i>23.3</i>    | 18.0<br>(17.9)<br><i>23.3</i>                      | 18.2<br>(18.1)<br><i>23.5</i>    | 18.3<br>(18.2)<br><i>23.6</i>    |
| MS2                                    | -11.7<br>(-11.4)<br><i>-7.8</i>  | -10.2<br>(-9.9)<br><i>-6.4</i>               | -10.4<br>(-10.0)<br><i>-6.5</i>  | -10.5<br>(-10.1)<br><i>-6.6</i>  | -9.9<br>(-9.6)<br><i>-6.0</i>                      | -10.1<br>(-9.7)<br><i>-6.2</i>   | -10.2<br>(-9.8)<br><i>-6.3</i>   |
| CH <sub>3</sub> S + CH <sub>3</sub> Cl | -11.1<br>(-11.2)<br><i>-14.2</i> | -9.5<br>(-9.7)<br><i>-12.6</i>               | -9.9<br>(-10.0)<br><i>-12.9</i>  | -10.1<br>(-10.2)<br><i>-13.2</i> | -9.3<br>(-9.5)<br><i>-12.4</i>                     | -9.7<br>(-9.8)<br><i>-12.8</i>   | -10.0<br>(-10.1)<br><i>-13.1</i> |
| <b>Channel C, C'</b>                   |                                  |                                              |                                  |                                  |                                                    |                                  |                                  |
| Adduct 1                               | -22.7<br>(-23.1)<br><i>-16.2</i> | -19.0<br>(-19.3)<br><i>-12.5</i>             | -20.1<br>(-20.4)<br><i>-13.6</i> | -20.9<br>(-21.2)<br><i>-14.4</i> | -18.4<br>(-)<br><i>18.7</i><br><i>-11.9</i>        | -19.5<br>(-19.8)<br><i>-13.1</i> | -20.3<br>(-20.7)<br><i>-13.8</i> |
| TS3                                    | 7.2<br>(7.1)<br><i>13.4</i>      | 10.0<br>(9.9)<br><i>16.2</i>                 | 8.8<br>(8.8)<br><i>15.0</i>      | 8.0<br>(7.9)<br><i>14.2</i>      | 10.7<br>(10.6)<br><i>16.9</i>                      | 9.6<br>(9.5)<br><i>15.8</i>      | 8.8<br>(8.7)<br><i>15.0</i>      |
| MS3                                    | 4.3<br>(5.1)<br><i>8.9</i>       | 7.9<br>(8.7)<br><i>12.5</i>                  | 6.5<br>(7.4)<br><i>11.1</i>      | 5.5<br>(6.3)<br><i>10.1</i>      | 8.4<br>(9.3)<br><i>13.0</i>                        | 7.0<br>(7.9)<br><i>11.6</i>      | 6.0<br>(6.9)<br><i>10.6</i>      |
| CH <sub>3</sub> SCl + CH <sub>3</sub>  | 5.6<br>(6.4)                     | 8.1<br>(8.9)                                 | 6.5<br>(7.3)                     | 5.4<br>(6.2)                     | 8.3<br>(9.1)                                       | 6.7<br>(7.5)                     | 5.6<br>(6.3)                     |

|  |     |     |     |     |     |     |     |
|--|-----|-----|-----|-----|-----|-----|-----|
|  | 2.8 | 5.3 | 3.7 | 2.6 | 5.5 | 3.9 | 2.8 |
|--|-----|-----|-----|-----|-----|-----|-----|

<sup>a</sup>The thermal correction to the enthalpy obtained using the UM06-2X/aVTZ method were added to the UCCSD(T) single point energy (ZPE is included in the electronic energies).

<sup>b</sup>The structure of RC1 was obtained from its respective IRC and the energetic parameters were obtained by single point calculations.



**Table S5:** DMS + Cl + H<sub>2</sub>O:Relative electronic energies ( $\Delta E$ , kcal.mol<sup>-1</sup>), relative enthalpies (in bracket,  $\Delta H_{f,298K}^\phi$ , kcal.mol<sup>-1</sup>)<sup>a</sup> and relative free energies (in italic,  $\Delta G_{f,298K}^\phi$ , kcal.mol<sup>-1</sup>) for the channel A.

|                                                          | UM06-2X/aVTZ                     | UCCSD(T)/aVnZ //UM06-2X/aVTZ (n = T and Q) |                                  | UCCSD(T)/CBS//UM06-2X/aVTZ       | DLPNO-UCCSD(T)/aVnZ //UM06-2X/aVTZ (n = T and Q) |                                  | DLPNO-UCCSD(T)/CBS//UM06-2X/aVTZ |
|----------------------------------------------------------|----------------------------------|--------------------------------------------|----------------------------------|----------------------------------|--------------------------------------------------|----------------------------------|----------------------------------|
|                                                          |                                  | n = T                                      | n = Q                            |                                  | n = T                                            | n = Q                            |                                  |
| <b>Pathway (a)</b>                                       |                                  |                                            |                                  |                                  |                                                  |                                  |                                  |
| DMS•H <sub>2</sub> O + Cl                                | -4.4<br>(-4.5)<br><i>2.5</i>     | -4.2<br>(-4.3)<br><i>2.7</i>               | -3.9<br>(-4.0)<br><i>3.0</i>     | -3.8<br>(-3.9)<br><i>3.1</i>     | -4.0<br>(-4.1)<br><i>2.9</i>                     | -3.8<br>(-3.9)<br><i>3.1</i>     | -3.7<br>(-3.8)<br><i>3.2</i>     |
| DMS•H <sub>2</sub> O + Cl → DMS•H <sub>2</sub> O•Cl-1    | -26.0<br>(-26.2)<br><i>-11.8</i> | -21.9<br>(-22.1)<br><i>-7.7</i>            | -22.8<br>(-23.0)<br><i>-8.7</i>  | -23.5<br>(-23.7)<br><i>-9.3</i>  | -21.0<br>(-21.3)<br><i>-6.9</i>                  | -22.0<br>(-22.3)<br><i>-7.9</i>  | -22.8<br>(-23.0)<br><i>-8.6</i>  |
| TS1•H <sub>2</sub> O-A                                   | -7.7<br>(-8.2)<br><i>6.3</i>     | -4.0<br>(-4.5)<br><i>10.0</i>              | <sup>b</sup><br>–                | <sup>b</sup><br>–                | -2.8<br>(-3.3)<br><i>11.2</i>                    | -2.7<br>(-3.2)<br><i>11.4</i>    | -2.6<br>(-3.1)<br><i>11.4</i>    |
| TS1•H <sub>2</sub> O-B                                   | -14.1<br>(-14.7)<br><i>0.0</i>   | -10.8<br>(-11.4)<br><i>3.3</i>             | -11.5<br>(-12.0)<br><i>2.7</i>   | -12.0<br>(-12.5)<br><i>2.2</i>   | -9.9<br>(-10.5)<br><i>4.2</i>                    | -10.6<br>(-11.2)<br><i>3.5</i>   | -11.1<br>(-11.7)<br><i>3.0</i>   |
| MS1•H <sub>2</sub> O-1                                   | -15.8<br>(-15.4)<br><i>-3.6</i>  | -15.0<br>(-14.6)<br><i>-2.8</i>            | -16.0<br>(-15.5)<br><i>-3.7</i>  | -16.6<br>(-16.2)<br><i>-4.4</i>  | -14.3<br>(-13.8)<br><i>-2.0</i>                  | -15.2<br>(-14.7)<br><i>-2.9</i>  | -15.8<br>(-15.4)<br><i>-3.6</i>  |
| <b>Pathway (c)</b>                                       |                                  |                                            |                                  |                                  |                                                  |                                  |                                  |
| DMS•Cl + H <sub>2</sub> O                                | -22.7<br>(-23.1)<br><i>-16.2</i> | -19.0<br>(-19.3)<br><i>-12.5</i>           | -20.1<br>(-20.4)<br><i>-13.6</i> | -20.9<br>(-21.2)<br><i>-14.4</i> | -18.4<br>(-18.7)<br><i>-11.9</i>                 | -19.5<br>(-19.8)<br><i>-13.0</i> | -20.3<br>(-20.7)<br><i>-13.8</i> |
| DMS•Cl + H <sub>2</sub> O → DMS•H <sub>2</sub> O•Cl-2    | -29.9<br>(-30.5)<br><i>-15.1</i> | -25.9<br>(-26.5)<br><i>-11.1</i>           | -26.7<br>(-27.3)<br><i>-11.9</i> | -27.3<br>(-27.9)<br><i>-12.5</i> | -25.1<br>(-25.7)<br><i>-10.3</i>                 | -25.9<br>(-26.5)<br><i>-11.1</i> | -26.5<br>(-27.1)<br><i>-11.7</i> |
| TS1•H <sub>2</sub> O-C                                   | -4.7<br>(-6.4)<br><i>11.2</i>    | 0.7<br>(-1.0)<br><i>16.5</i>               | -0.3<br>(-2.0)<br><i>15.6</i>    | -1.1<br>(-2.7)<br><i>14.8</i>    | 2.0<br>(0.4)<br><i>17.9</i>                      | 1.0<br>(-0.7)<br><i>16.9</i>     | 0.3<br>(-1.4)<br><i>16.1</i>     |
| MS1•H <sub>2</sub> O-2                                   | -18.1<br>(-18.3)<br><i>-4.1</i>  | -17.0<br>(-17.2)<br><i>-3.0</i>            | -18.0<br>(-18.2)<br><i>-4.0</i>  | -18.7<br>(-18.9)<br><i>-4.7</i>  | -14.3<br>(-13.8)<br><i>-2.2</i>                  | -15.2<br>(-14.7)<br><i>-3.2</i>  | -17.9<br>(-18.1)<br><i>-3.9</i>  |
| CH <sub>3</sub> SCH <sub>2</sub> •H <sub>2</sub> O + HCl | -12.4<br>(-11.9)<br><i>-7.1</i>  | -11.6<br>(-11.1)<br><i>-6.3</i>            | -12.7<br>(-12.2)<br><i>-7.4</i>  | -13.5<br>(-13.0)<br><i>-8.2</i>  | -11.0<br>(-10.5)<br><i>-5.7</i>                  | -12.1<br>(-11.6)<br><i>-6.8</i>  | -12.9<br>(-12.4)<br><i>-7.6</i>  |
| CH <sub>3</sub> SCH <sub>2</sub> + HCl•H <sub>2</sub> O  | -13.0<br>(-12.7)<br><i>-9.7</i>  | -12.5<br>(-12.2)<br><i>-9.2</i>            | -13.9<br>(-13.7)<br><i>-10.7</i> | -15.0<br>(-14.7)<br><i>-11.7</i> | -12.0<br>(-11.7)<br><i>-8.7</i>                  | -13.5<br>(-13.3)<br><i>-10.3</i> | -14.6<br>(-14.4)<br><i>-11.4</i> |
| CH <sub>3</sub> SCH <sub>2</sub>                         | -9.1                             | -8.5                                       | -10.0                            | -11.1                            | -8.4                                             | -9.7                             | -10.8                            |

|                  |        |        |        |         |        |        |         |
|------------------|--------|--------|--------|---------|--------|--------|---------|
| + HCl +          | (-8.2) | (-7.7) | (-9.2) | (-10.2) | (-7.3) | (-8.8) | (-10.0) |
| H <sub>2</sub> O | -11.5  | -10.9  | -12.4  | -13.5   | -10.5  | -12.1  | -13.2   |

<sup>a</sup>The thermal correction to the enthalpy obtained using the UM06-2X/aVTZ method was added to the UCCSD(T) single point energy (ZPE is included in the electronic energies).

<sup>b</sup>Reliable value could not be obtained; calculations were very lengthy involving several re-starts, thus extrapolation to the CBS limit could not be performed. However, a reliable DLPNO-UCCSD(T)/CBS//UM06-2X/aVTZ value was obtained.

**Table S6:** DMS + Cl + H<sub>2</sub>O: Relative electronic energies ( $\Delta E$ , kcal.mol<sup>-1</sup>), relative enthalpies (in bracket,  $\Delta H_{f,298K}^\phi$ , kcal.mol<sup>-1</sup>)<sup>a</sup> and relative free energies (in italic,  $\Delta G_{f,298K}^\phi$ , kcal.mol<sup>-1</sup>) for channel B.

|                                                             | UM06-2X/aVTZ                     | UCCSD(T)/aVnZ//UM06-2X/aVTZ (n = T and Q) |                                  | UCCSD(T)/CBS//UM06-2X/aVTZ       | DLPNO-UCCSD(T)/aVnZ//UM06-2X/aVTZ (n = T and Q) |                                  | DLPNO-UCCSD(T)/CBS//UM06-2X/aVTZ |
|-------------------------------------------------------------|----------------------------------|-------------------------------------------|----------------------------------|----------------------------------|-------------------------------------------------|----------------------------------|----------------------------------|
|                                                             |                                  | n = T                                     | n = Q                            |                                  | n = T                                           | n = Q                            |                                  |
| <b>Pathway (a)</b>                                          |                                  |                                           |                                  |                                  |                                                 |                                  |                                  |
| DMS•H <sub>2</sub> O + Cl                                   | -4.4<br>(-4.5)<br><i>2.5</i>     | -4.2<br>(-4.3)<br><i>2.7</i>              | -3.9<br>(-4.0)<br><i>3.0</i>     | -3.8<br>(-3.9)<br><i>3.1</i>     | -4.0<br>(-4.1)<br><i>2.9</i>                    | -3.8<br>(-3.9)<br><i>3.1</i>     | -3.7<br>(-3.8)<br><i>3.2</i>     |
| DMS•H <sub>2</sub> O + Cl<br>→<br>DMS•H <sub>2</sub> O•Cl-3 | -15.5<br>(-16.1)<br><i>-1.6</i>  | -11.1<br>(-11.7)<br><i>2.8</i>            | -11.6<br>(-12.2)<br><i>3.0</i>   | -12.1<br>(-12.6)<br><i>1.9</i>   | -9.9<br>(-10.4)<br><i>4.1</i>                   | -10.4<br>(-11.0)<br><i>3.5</i>   | -10.8<br>(-11.4)<br><i>3.1</i>   |
| TS2•H <sub>2</sub> O-A                                      | 9.8<br>(9.3)<br><i>23.8</i>      | 12.2<br>(11.7)<br><i>26.2</i>             | 12.6<br>(12.1)<br><i>26.6</i>    | 12.9<br>(12.4)<br><i>26.9</i>    | 13.0<br>(12.5)<br><i>27.0</i>                   | 13.4<br>(12.9)<br><i>27.4</i>    | 13.6<br>(13.2)<br><i>27.7</i>    |
| MS2•H <sub>2</sub> O-1                                      | -18.4<br>(-18.3)<br><i>-5.4</i>  | -15.2<br>(-15.1)<br><i>-2.2</i>           | -15.0<br>(-14.9)<br><i>-2.0</i>  | -14.8<br>(-14.8)<br><i>-1.9</i>  | -14.2<br>(-14.1)<br><i>-1.2</i>                 | -14.1<br>(-14.0)<br><i>-1.1</i>  | -14.0<br>(-14.0)<br><i>-1.1</i>  |
| <b>Pathway (c)</b>                                          |                                  |                                           |                                  |                                  |                                                 |                                  |                                  |
| DMS•Cl + H <sub>2</sub> O                                   | -22.7<br>(-23.1)<br><i>-16.2</i> | -19.0<br>(-19.3)<br><i>-12.5</i>          | -20.1<br>(-20.4)<br><i>-13.6</i> | -20.9<br>(-21.2)<br><i>-14.4</i> | -18.4<br>(-18.7)<br><i>-11.9</i>                | -19.5<br>(-19.8)<br><i>-13.0</i> | -20.3<br>(-20.7)<br><i>-13.8</i> |
| DMS•Cl + H <sub>2</sub> O<br>→<br>DMS•Cl•H <sub>2</sub> O-4 | -29.5<br>(-30.0)<br><i>-14.9</i> | -25.4<br>(-25.9)<br><i>-10.7</i>          | -26.2<br>(-26.8)<br><i>-11.6</i> | -26.9<br>(-27.4)<br><i>-12.2</i> | -24.5<br>(-25.1)<br><i>-9.9</i>                 | -25.4<br>(-25.9)<br><i>-10.8</i> | -26.0<br>(-26.7)<br><i>-11.4</i> |
| TS2•H <sub>2</sub> O-B                                      | 32.1<br>(31.7)<br><i>46.2</i>    | 34.2<br>(33.8)<br><i>48.3</i>             | 34.4<br>(34.4)<br><i>48.5</i>    | 34.6<br>(34.2)<br><i>48.7</i>    | 35.3<br>(34.9)<br><i>49.4</i>                   | 35.5<br>(35.1)<br><i>49.6</i>    | 35.7<br>(35.3)<br><i>49.8</i>    |
| MS2•H <sub>2</sub> O-2                                      | -18.8<br>(-18.7)<br><i>-6.1</i>  | -15.7<br>(-15.6)<br><i>-2.9</i>           | -15.5<br>(-15.5)<br><i>-2.8</i>  | -15.4<br>(-15.4)<br><i>-2.7</i>  | -15.0<br>(-14.9)<br><i>-2.2</i>                 | -14.9<br>(-14.8)<br><i>-2.1</i>  | -14.8<br>(-14.7)<br><i>-2.1</i>  |
| DMS•Cl + H <sub>2</sub> O<br>→<br>DMS•Cl•H <sub>2</sub> O-2 | -29.9<br>(-30.5)<br><i>-15.1</i> | -25.9<br>(-26.5)<br><i>-11.1</i>          | -26.7<br>(-27.3)<br><i>-11.9</i> | -27.3<br>(-27.9)<br><i>-12.5</i> | -25.1<br>(-25.7)<br><i>-10.3</i>                | -25.9<br>(-26.5)<br><i>-11.1</i> | -26.5<br>(-27.1)<br><i>-11.7</i> |
| TS2•H <sub>2</sub> O-C                                      | 31.7<br>(31.2)<br><i>46.0</i>    | 33.5<br>(33.1)<br><i>47.9</i>             | 33.8<br>(33.4)<br><i>48.2</i>    | 34.1<br>(33.7)<br><i>48.5</i>    | 34.6<br>(34.2)<br><i>49.0</i>                   | 35.0<br>(34.5)<br><i>49.3</i>    | 35.2<br>(34.7)<br><i>49.5</i>    |
| MS2•H <sub>2</sub> O-3                                      | -17.6<br>(-17.3)                 | -15.3<br>(-14.9)                          | -15.1<br>(-14.7)                 | -14.9<br>(-14.6)                 | -14.6<br>(-14.2)                                | -14.5<br>(-14.1)                 | -14.4<br>(-14.0)                 |

|                                                                 | -5.6                             | -3.2                            | -3.0                            | -2.9                             | -2.5                            | -2.4                            | -2.3                             |
|-----------------------------------------------------------------|----------------------------------|---------------------------------|---------------------------------|----------------------------------|---------------------------------|---------------------------------|----------------------------------|
| CH <sub>3</sub> S +<br>CH <sub>3</sub> Cl•<br>H <sub>2</sub> O  | -13.8<br>(-13.9)<br><i>-10.9</i> | -12.1<br>(-12.3)<br><i>-9.3</i> | -12.3<br>(-12.4)<br><i>-9.4</i> | -12.4<br>(-12.5)<br><i>-9.5</i>  | -11.9<br>(-12.0)<br><i>-9.0</i> | -12.1<br>(-12.2)<br><i>-9.2</i> | -12.2<br>(-12.3)<br><i>-9.3</i>  |
| CH <sub>3</sub> S•H<br>2O +<br>CH <sub>3</sub> Cl               | -15.0<br>(-15.2)<br><i>-10.9</i> | -13.1<br>(-13.3)<br><i>-9.0</i> | -13.3<br>(-13.5)<br><i>-9.2</i> | -13.4<br>(-13.6)<br><i>-9.3</i>  | -12.7<br>(-13.0)<br><i>-8.7</i> | -13.0<br>(-13.2)<br><i>-8.9</i> | -13.1<br>(-13.4)<br><i>-9.0</i>  |
| CH <sub>3</sub> S +<br>CH <sub>3</sub> Cl +<br>H <sub>2</sub> O | -11.1<br>(-11.2)<br><i>-14.2</i> | -9.5<br>(-9.7)<br><i>-12.6</i>  | -9.9<br>(-10.0)<br><i>-12.9</i> | -10.1<br>(-10.2)<br><i>-13.2</i> | -9.3<br>(-9.5)<br><i>-12.4</i>  | -9.7<br>(-9.8)<br><i>-12.8</i>  | -10.0<br>(-10.1)<br><i>-13.1</i> |

<sup>a</sup>The thermal correction to the enthalpy obtained using the UM06-2X/aVTZ method was added to the UCCSD(T) single point energy (ZPE is included in the electronic energies).

**Table S7:** Summary of TST (Transition State Theory) and TST+W (Wigner correction) rate coefficients<sup>[71]</sup> for the DMS+Cl+H<sub>2</sub>O reaction, obtained using DLPNO-UCCSD(T)/CBS//UM06-2X/aVTZ relative energies

| Reaction                         |                                                                                    | TST Rate coefficient<br>(TST+W values in<br>brackets) at 298K<br>cm <sup>3</sup> .molecule <sup>-1</sup> s <sup>-1</sup> | Reference<br>Figure |
|----------------------------------|------------------------------------------------------------------------------------|--------------------------------------------------------------------------------------------------------------------------|---------------------|
| <b>DMS+Cl</b>                    |                                                                                    |                                                                                                                          |                     |
|                                  | Channel A via TS1<br>$\Delta E$ set as 0 kcal.mol <sup>-1</sup>                    | $2.25 \times 10^{-9}$<br>( $3.02 \times 10^{-9}$ )                                                                       | Fig.1               |
|                                  | Channel B via TS2 with<br>$\Delta E = 18.3$ kcal.mol <sup>-1</sup>                 | $6.06 \times 10^{-25}$<br>( $9.84 \times 10^{-25}$ )                                                                     | Fig.1               |
|                                  | Channel C via TS3<br>$\Delta E = 8.8$ kcal.mol <sup>-1</sup>                       | $1.32 \times 10^{-18}$<br>( $1.44 \times 10^{-18}$ )                                                                     | Fig.1               |
| <b>DMS+Cl +H<sub>2</sub>O</b>    |                                                                                    |                                                                                                                          |                     |
| via<br>DMS•H <sub>2</sub> O + Cl | Channel A via TS1.H <sub>2</sub> O-A<br>$\Delta E = 1.1$ kcal.mol <sup>-1</sup>    | $1.20 \times 10^{-13}$<br>( $1.69 \times 10^{-13}$ )                                                                     | Fig.4               |
| via<br>DMS•H <sub>2</sub> O + Cl | Channel A via TS1.H <sub>2</sub> O-B<br>$\Delta E$ set as 0 kcal.mol <sup>-1</sup> | $1.05 \times 10^{-9}$<br>( $1.64 \times 10^{-9}$ )                                                                       | Fig.4               |
| via<br>DMS•Cl + H <sub>2</sub> O | Channel A via TS1.H <sub>2</sub> O-C<br>$\Delta E = 20.6$ kcal.mol <sup>-1</sup>   | $1.33 \times 10^{-29}$<br>( $3.89 \times 10^{-29}$ )                                                                     | Fig.5               |
| via<br>DMS•H <sub>2</sub> O + Cl | Channel B via TS2.H <sub>2</sub> O-A<br>$\Delta E = 17.3$ kcal.mol <sup>-1</sup>   | $3.07 \times 10^{-25}$<br>( $4.60 \times 10^{-25}$ )                                                                     | Fig.6               |
| via<br>DMS•Cl + H <sub>2</sub> O | Channel B via TS2.H <sub>2</sub> O-B<br>$\Delta E = 56.0$ kcal.mol <sup>-1</sup>   | $2.90 \times 10^{-54}$<br>( $4.08 \times 10^{-54}$ )                                                                     | Fig.7               |
| via<br>DMS•Cl + H <sub>2</sub> O | Channel B via TS2.H <sub>2</sub> O-C<br>$\Delta E = 56.0$ kcal.mol <sup>-1</sup>   | $4.26 \times 10^{-54}$<br>( $5.93 \times 10^{-54}$ )                                                                     | Fig.7               |

**Figure S1:** Energy profiles for the reaction of DMS + Cl using the UM06-2X/aVDZ method. The relative electronic energies ( $\Delta E$ ) are reported in kcal.mol<sup>-1</sup> \*.

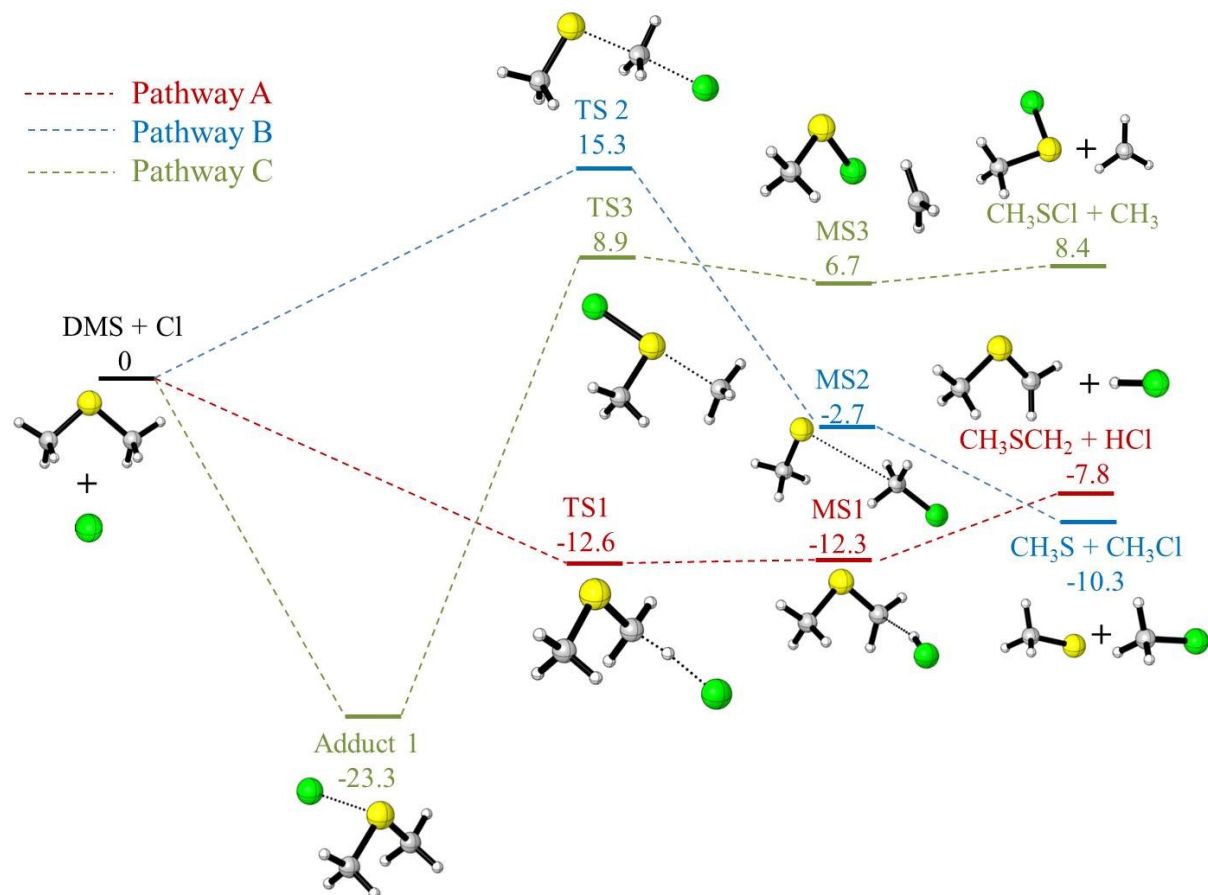

\*RC1 and RC2 were only located at the UM06-2X/aVTZ level

**Figure S2:** UM06-2X/aVDZ optimised geometries of the stationary points shown in Figure S1.

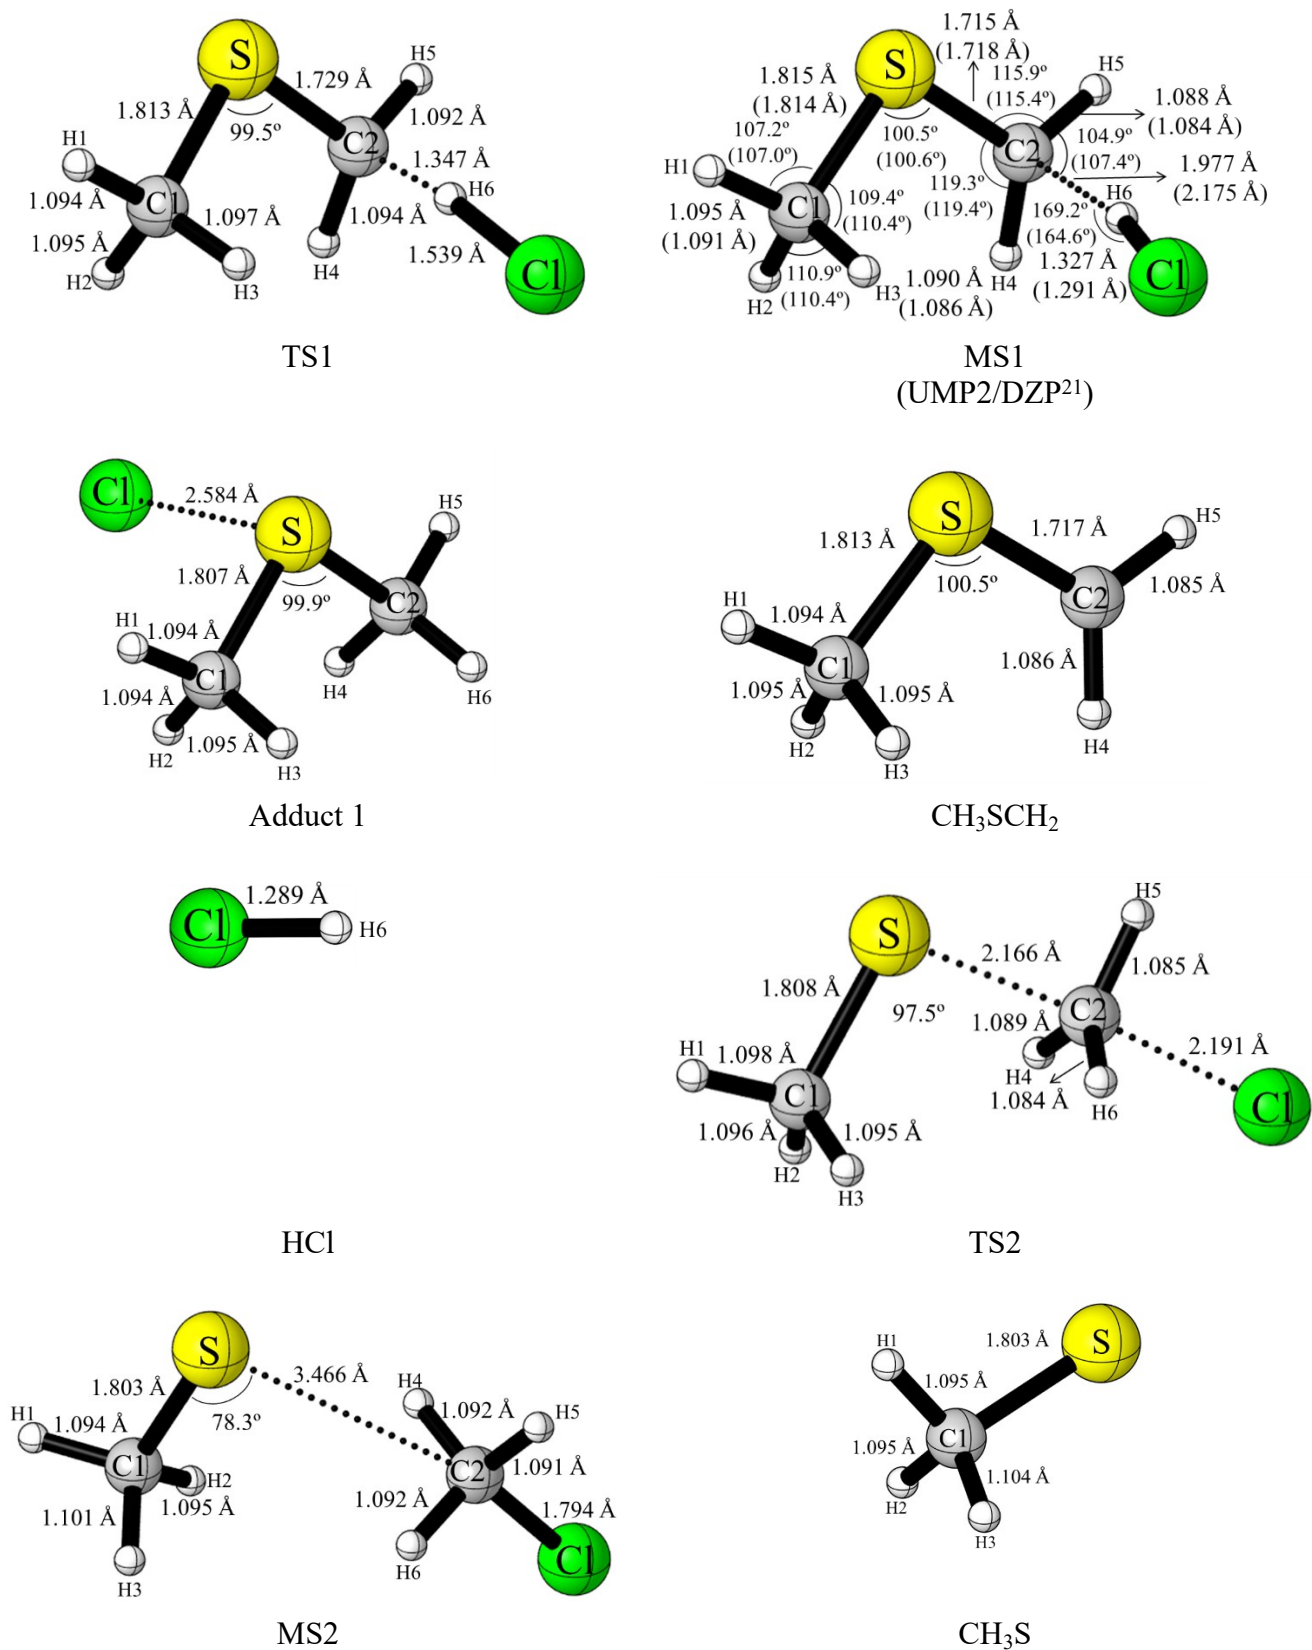

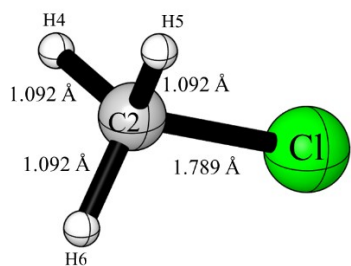

$\text{CH}_3\text{Cl}$

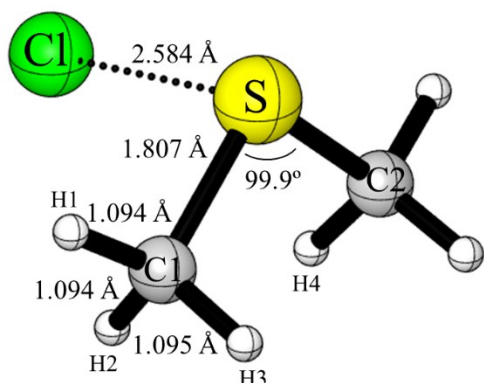

Adduct 1

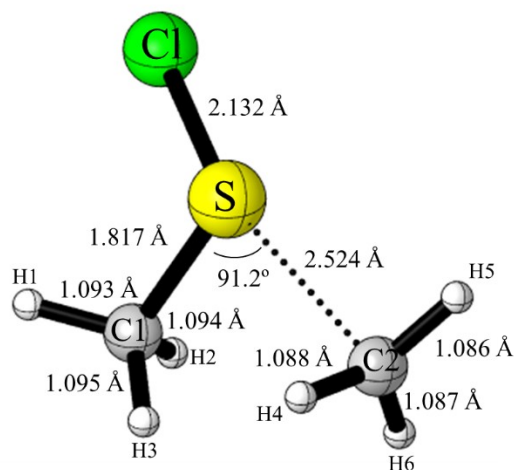

TS3

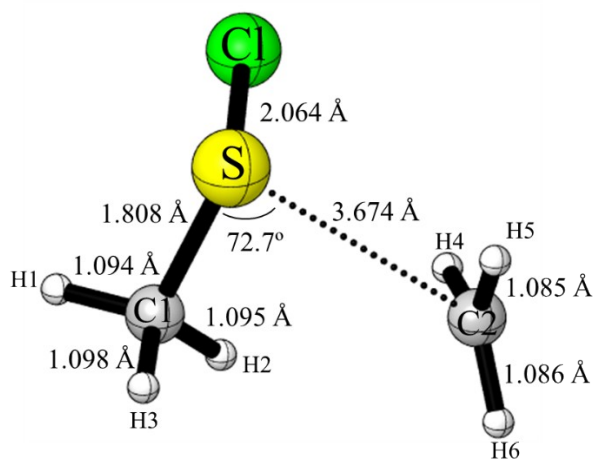

MS3

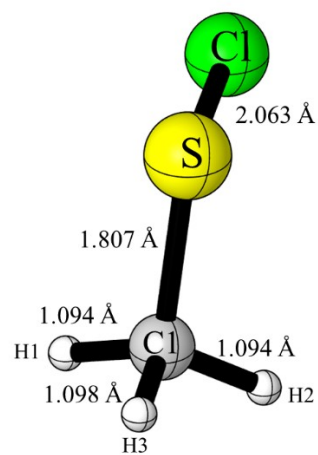

$\text{CH}_3\text{SCl}$

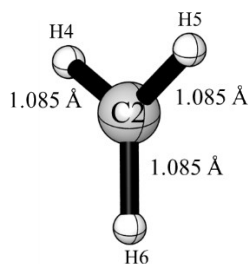

$\text{CH}_3$



**Figure S3:** UM06-2X/aVTZ optimised geometries of the stationary points RC2, TS2, MS2, CH<sub>3</sub>S, CH<sub>3</sub>Cl, TS3, MS3, CH<sub>3</sub>SCl and CH<sub>3</sub> shown in Figure 1.

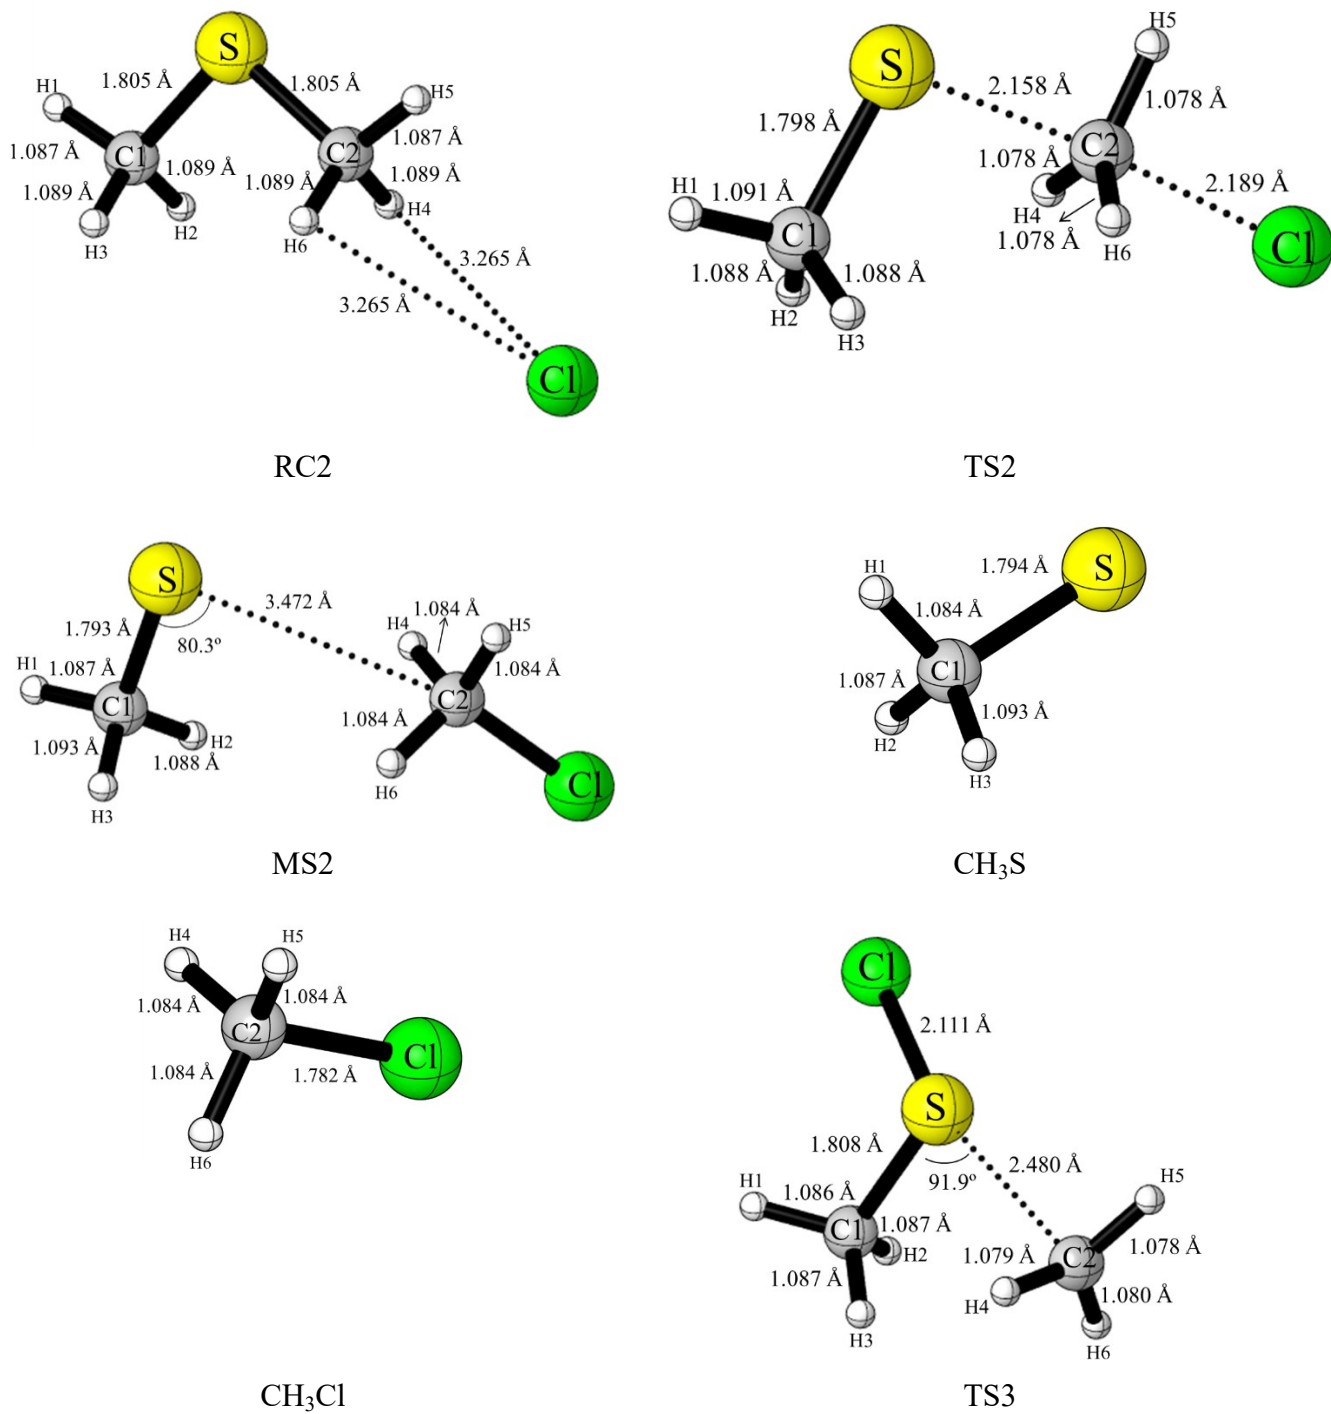

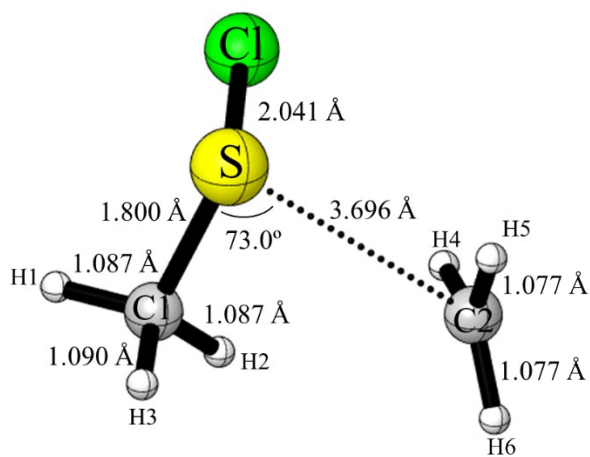

MS3

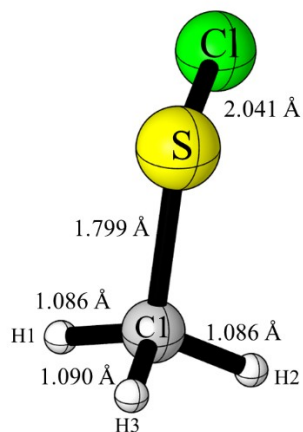

CH<sub>3</sub>S-Cl

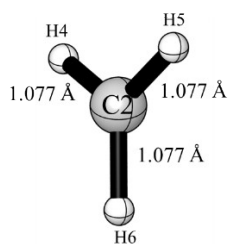

CH<sub>3</sub>

**Figure S4:** UM06-2X/aVDZ and UM06-2X/aVTZ optimised geometries for DMS•H<sub>2</sub>O, Cl•H<sub>2</sub>O and DMS•Cl.

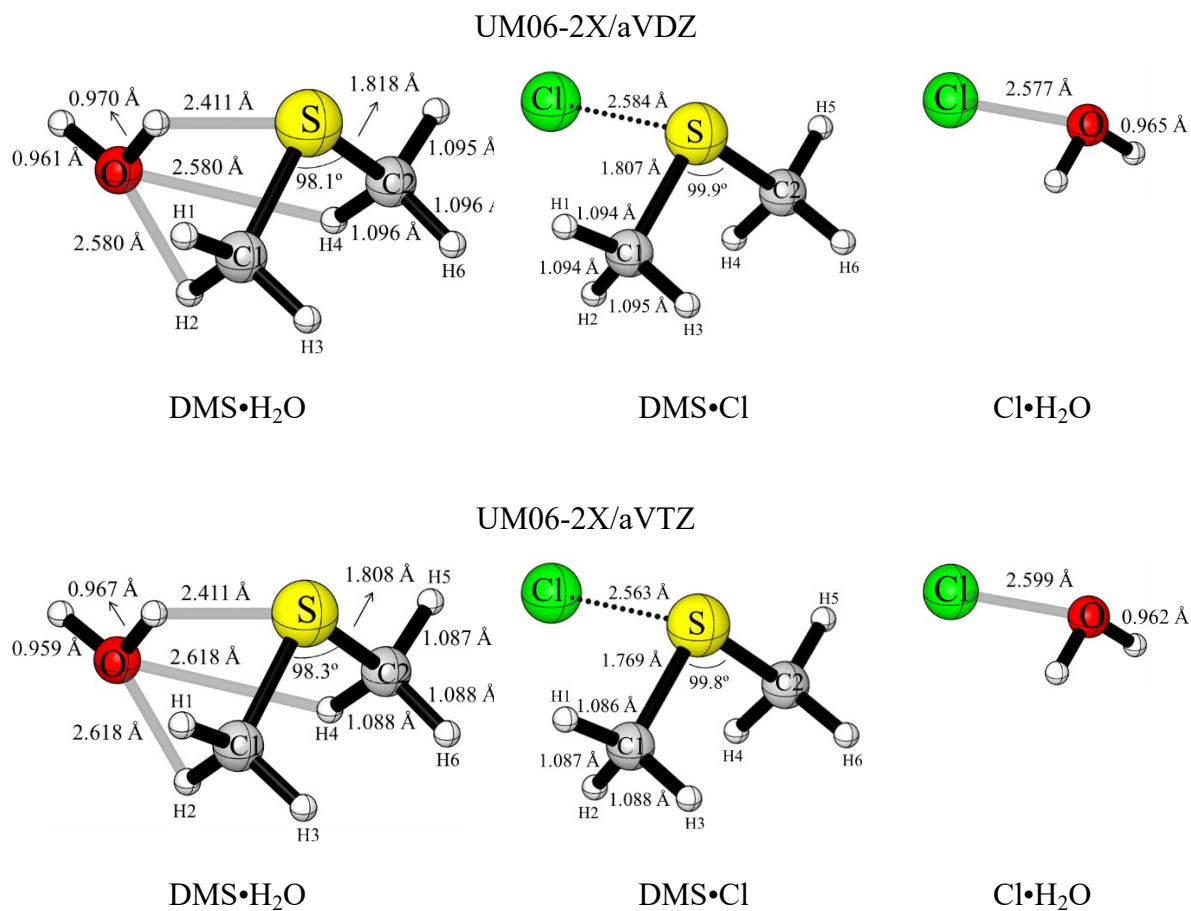

## A discussion of the geometrical parameters of the stationary points of the DMS + Cl reaction shown in Figure 2.

For channel A the TS involved in the hydrogen abstraction, TS1, consists of the simultaneous breaking of the C-H bond (TS1 bond length 1.310 Å) and forming of the H-Cl bond (TS1 bond length 1.565 Å). The S-C2 bond length of TS1 is shortened by 0.084 Å compared to the equivalent bond length in DMS and this is also accompanied by an increase in the C-S-C bond angle by 0.9° (see Figure 2). Consequently, TS1 leads to a weakly bound complex MS1 where the bond distance between C2 in CH<sub>2</sub> of CH<sub>3</sub>SCH<sub>2</sub> and H6 of HCl is 2.063 Å. In MS1, the S-C2 bond length is further shortened to 1.702 Å which is comparable to the S-C2 bond length of CH<sub>3</sub>SCH<sub>2</sub>. The C-S-C bond angle of both MS1 (100.7°) and CH<sub>3</sub>SCH<sub>2</sub> (100.6°) is comparable. The geometrical parameters obtained using the UM06-2X/aVDZ method are close to those obtained by the UM06-2X/aVTZ method and are in good agreement with those reported using the UMP2/DZP method.<sup>[27]</sup> The geometrical parameters of TS1 were compared with the parameters of the hydrogen abstraction TS obtained for the DMS + Cl<sub>2</sub> reaction<sup>[41]</sup> using the MP2/aVDZ method (refer to TS2 of ref [41]). The reported TS<sup>[41]</sup> was re-optimised in our work using the M06-2X/aVTZ method so that comparison could be made with the DMS-Cl TS. It was observed that for the DMS + Cl<sub>2</sub> reaction, the C-H and H-Cl bond distances are 1.321 Å and 1.637 Å, respectively (C-S-C bond angle = 101.3°; S-C2 = 1.697 Å), indicating that TS1 for the DMS + Cl reaction is more advanced on the reaction surface compared with the TS of the reaction with Cl<sub>2</sub>.

For channel C', the Cl atom of adduct 1 interacts with the S atom of DMS in a C<sub>s</sub> symmetry structure with a computed S-Cl bond distance of 2.563 Å and C-S-Cl bond angle of 92.0° at the UM06-2X/aVTZ level (see Figure 2). Upon the formation of adduct 1, the C-S-C bond angle increases slightly from 98.6° (DMS) to 99.8° along with the shortening of the S-C bond length from 1.806 Å (DMS) to 1.769 Å in adduct 1. The UM06-2X/aVDZ and UM06-2X/aVTZ geometrical parameters are in excellent agreement with the computed values reported using the UMP2/DZP method<sup>[41]</sup> where the S-Cl bond distance is 2.587 Å and the C-S-Cl bond angle is 99.6°. However, the significant difference between these methods lies in their electronic energies relative to the reactants (UMP2/DZP = -11.9 kcal/mol; UM06-2X/aVDZ = -23.3 kcal/mol; UM06-2X/aVTZ = -22.7 kcal.mol<sup>-1</sup>).

On comparing the computed UM06-2X geometrical parameters for adduct 1 with available theoretical values,<sup>[25,27-29]</sup> it is found that there are differences in the computed S-Cl bond distance (see Table S2 where comparison is made with results B3LYP/6-311++G(2df,2p)

(2.50 Å), B3LYP/6-311++G(3df,3pd) (2.62 Å) and MP2/6-311++G(2df,2p) (2.59 Å) calculations; UM06-2X/aVTZ value this work 2.563 Å))

It is also interesting to compare the computed structure of adduct 1,  $((\text{CH}_3)_2\text{SCl})$ , with that of the covalent complex,  $(\text{CH}_3)_2\text{SCl}_2$ , obtained in the DMS +  $\text{Cl}_2$  study.<sup>[41]</sup> The  $(\text{CH}_3)_2\text{SCl}_2$  complex has been observed experimentally by photoelectron spectroscopy and studied theoretically using the MP2/aVDZ method.<sup>[41]</sup> The computed geometrical parameters of both complexes are similar; the C-S-C bond angle and the S-C bond length of  $(\text{CH}_3)_2\text{SCl}_2$  is computed in ref [41] as  $110.3^\circ$  and 1.828 Å. These values compare with those computed in this work for adduct1 at the UM06-2X/aVDZ level of  $99.9^\circ$  and 1.807 Å, and at the UM06-2X/aVTZ level of  $99.8^\circ$  and 1.769 Å. In addition, the Cl-S-C bond angle of  $(\text{CH}_3)_2\text{SCl}_2$  is computed as  $91.9^\circ$  while that of adduct 1 is  $92.0^\circ$  (UM06-2X/aVTZ).

The UM06-2X/aVDZ and UM06-2X/aVTZ optimised geometries of RC2, TS2, MS2, TS3, MS3,  $\text{CH}_3\text{SCl}$ ,  $\text{CH}_3$ ,  $\text{CH}_3\text{S}$  and  $\text{CH}_3\text{Cl}$  are displayed in Figures S2 and S3.

### **Comparison of the potential energy profiles obtained in ref.(27) with those obtained in this work.**

In the work of Resende and De Almeida,<sup>[27]</sup> the potential profiles of these reactions were obtained at the UQCISD(T)/DZP//UMP2/DZP level (see Fig.(5) of ref.[27]). On comparing these profiles with those obtained in this work (Figure 1), a number of differences were noted in the stationary points obtained:-

(i) Figure 1 of this work obtained from UM06-2X/aVTZ calculations shows that channel A proceeds via a reaction complex (RC1) to a transition state (TS1), and then to a product complex (MS1) and on to the separate products ( $\text{CH}_3\text{SCH}_2 + \text{HCl}$ ). These stationary points were found in the UMP2 calculations of ref [27], apart from RC1 and TS1 which were not located <sup>[27]</sup>.

(ii) This figure also shows that channel B proceeds via a reaction complex (RC2) to a transition state (TS2), a product complex (MS2) and then on to the products ( $\text{CH}_3\text{S} + \text{CH}_3\text{Cl}$ ). These features were also found in ref [27]. Channel C proceeds via an adduct (adduct 1 of C') via a transition state (TS3) to a product complex (MS3) and on to the products ( $\text{CH}_3\text{SCl} + \text{CH}_3$ ). All these features were located in ref [27].

## Summary of previous computation work on the DMS + Cl reaction (25,27-30)

The DMS + Cl reaction has also been the subject of a number of theoretical studies.[25,27-30]. Resende and Almeida[27] used UQCISD(T)/DZP//UMP2/DZP calculations to locate maxima and minima on the potential energy surfaces of channels A – C' and calculate the activation energies, reaction enthalpies ( $\Delta H_{f,298}^{\phi}$ ) and free energies ( $\Delta G_{f,298}^{\phi}$ ) for all four channels. The minimum energy geometry of the adduct ( $\text{CH}_3\text{S}(\text{Cl})\text{CH}_3$ ) was determined and the enthalpy of channel C' ( $\Delta H_{f,298}^{\phi}$ ) evaluated as -12.72 kcal.mol<sup>-1</sup>. Wilson and Hirst[28] used MP2(full)/6-311G(d,p) calculations to determine the geometry of the reagents and adduct, and evaluate the enthalpy of channel C' ( $\Delta H_{f,298}^{\phi}$ ) as -19.35 kcal.mol<sup>-1</sup>. Similar calculations have been made by Thompson et al.,[29] Enami et al.[25] and McKee[30] at the B3LYP/6-311++G(2df,p)//B3LYP/6-311++G(d,p), QCISD(T)/6-311++G(3df,3dp)//B3LYP/6-311++G(3df,3pd), and PMP2/6-31G(d,p)//UHF/3-21G(d) levels, respectively and values of the reaction enthalpy for channel C' ( $\Delta H_{f,298}^{\phi}$ ) of -23.2, -17.7 and -12.1 kcal.mol<sup>-1</sup> have been obtained. A summary of these values, and their expected reliability, is given in Table S1.

**Cartesian coordinates for all stationary points for the DMS + Cl using the UM06-2X/aVDZ and UM06-2X/aVTZ methods.**

| UM06-2X/aVDZ                                                                               |              |              |              | UM06-2X/aVTZ                                                                               |              |              |              |
|--------------------------------------------------------------------------------------------|--------------|--------------|--------------|--------------------------------------------------------------------------------------------|--------------|--------------|--------------|
| <b>DMS</b>                                                                                 |              |              |              |                                                                                            |              |              |              |
| Total energy = -477.9505539 Hartrees<br>Nuclear repulsion energy = 110.5081635842 Hartrees |              |              |              | Total energy = -477.9971871 Hartrees<br>Nuclear repulsion energy = 111.1417188779 Hartrees |              |              |              |
| 6                                                                                          | 0.000000000  | 1.376298000  | -0.517288000 | 6                                                                                          | 0.000000000  | 1.368528000  | -0.514712000 |
| 1                                                                                          | -0.898057000 | 1.347478000  | -1.145004000 | 1                                                                                          | -0.890710000 | 1.338894000  | -1.139167000 |
| 1                                                                                          | 0.000000000  | 2.304043000  | 0.064006000  | 1                                                                                          | 0.000000000  | 2.291181000  | 0.059645000  |
| 1                                                                                          | 0.898057000  | 1.347478000  | -1.145004000 | 1                                                                                          | 0.890710000  | 1.338894000  | -1.139167000 |
| 6                                                                                          | 0.000000000  | -1.376298000 | -0.517288000 | 6                                                                                          | 0.000000000  | -1.368528000 | -0.514712000 |
| 1                                                                                          | 0.000000000  | -2.304043000 | 0.064006000  | 1                                                                                          | 0.000000000  | -2.291181000 | 0.059645000  |
| 1                                                                                          | -0.898057000 | -1.347478000 | -1.145004000 | 1                                                                                          | -0.890710000 | -1.338894000 | -1.139167000 |
| 1                                                                                          | 0.898057000  | -1.347478000 | -1.145004000 | 1                                                                                          | 0.890710000  | -1.338894000 | -1.139167000 |
| 16                                                                                         | 0.000000000  | 0.000000000  | 0.666216000  | 16                                                                                         | 0.000000000  | 0.000000000  | 0.663371000  |
| <b>Adduct 1 (DMS•Cl)</b>                                                                   |              |              |              |                                                                                            |              |              |              |
| Total energy = -938.112414 Hartrees<br>Nuclear repulsion energy = 216.1200072096 Hartrees  |              |              |              | Total energy = -938.1757205 Hartrees<br>Nuclear repulsion energy = 217.4425066686 Hartrees |              |              |              |
| 6                                                                                          | 0.304095000  | 1.113614000  | 1.382749000  | 6                                                                                          | 0.301245000  | 1.110030000  | 1.374735000  |
| 1                                                                                          | -0.169992000 | 0.741711000  | 2.295731000  | 1                                                                                          | -0.172714000 | 0.753177000  | 2.284822000  |
| 1                                                                                          | 1.290425000  | 0.654143000  | 1.267448000  | 1                                                                                          | 1.280466000  | 0.650002000  | 1.268912000  |
| 1                                                                                          | 0.367319000  | 2.206885000  | 1.406417000  | 1                                                                                          | 0.371160000  | 2.195808000  | 1.388547000  |
| 6                                                                                          | 0.304095000  | 1.113614000  | -1.382749000 | 6                                                                                          | 0.301245000  | 1.110030000  | -1.374735000 |
| 1                                                                                          | 1.290425000  | 0.654143000  | -1.267448000 | 1                                                                                          | 1.280466000  | 0.650002000  | -1.268912000 |
| 1                                                                                          | -0.169992000 | 0.741711000  | -2.295731000 | 1                                                                                          | -0.172714000 | 0.753177000  | -2.284822000 |
| 1                                                                                          | 0.367319000  | 2.206885000  | -1.406417000 | 1                                                                                          | 0.371160000  | 2.195808000  | -1.388547000 |
| 17                                                                                         | 0.304095000  | -1.769806000 | 0.000000000  | 17                                                                                         | 0.301245000  | -1.759422000 | 0.000000000  |
| 16                                                                                         | -0.737142000 | 0.594866000  | 0.000000000  | 16                                                                                         | -0.730871000 | 0.586989000  | 0.000000000  |
| <b>TS1</b>                                                                                 |              |              |              |                                                                                            |              |              |              |
| Total energy = -938.0879833 Hartrees<br>Nuclear repulsion energy = 201.7328642301 Hartrees |              |              |              | Total energy = -938.1503603 Hartrees<br>Nuclear repulsion energy = 202.3664870835 Hartrees |              |              |              |
| 6                                                                                          | -0.270262000 | -1.139662000 | 0.544867000  | 6                                                                                          | -0.263969000 | -1.127791000 | 0.539289000  |
| 1                                                                                          | -0.257609000 | -0.882927000 | 1.608454000  | 1                                                                                          | -0.266862000 | -0.884088000 | 1.598398000  |
| 1                                                                                          | -0.165420000 | -2.201941000 | 0.316018000  | 1                                                                                          | -0.166331000 | -2.184379000 | 0.316608000  |
| 1                                                                                          | 0.898740000  | -0.579556000 | 0.179086000  | 1                                                                                          | 0.873988000  | -0.586222000 | 0.182995000  |
| 6                                                                                          | -1.395264000 | 1.307908000  | 0.306962000  | 6                                                                                          | -1.401455000 | 1.300237000  | 0.302430000  |
| 1                                                                                          | -2.082310000 | 1.944442000  | -0.257677000 | 1                                                                                          | -2.106525000 | 1.922698000  | -0.240581000 |
| 1                                                                                          | -1.692682000 | 1.276101000  | 1.360341000  | 1                                                                                          | -1.668545000 | 1.266922000  | 1.356124000  |
| 1                                                                                          | -0.367219000 | 1.675496000  | 0.204517000  | 1                                                                                          | -0.388892000 | 1.681982000  | 0.177617000  |
| 16                                                                                         | -1.476261000 | -0.353777000 | -0.413709000 | 16                                                                                         | -1.474363000 | -0.354670000 | -0.409974000 |
| 17                                                                                         | 2.192931000  | 0.201137000  | -0.111904000 | 17                                                                                         | 2.194443000  | 0.201361000  | -0.110700000 |
| <b>TS2</b>                                                                                 |              |              |              |                                                                                            |              |              |              |
| Total energy = -938.0484727 Hartrees<br>Nuclear repulsion energy = 190.6583222755 Hartrees |              |              |              | Total energy = -938.1121088 Hartrees<br>Nuclear repulsion energy = 191.1443694485 Hartrees |              |              |              |
| 6                                                                                          | 2.213315000  | 1.071568000  | 0.006273000  | 6                                                                                          | 2.221967000  | 1.060503000  | -0.000095000 |
| 1                                                                                          | 3.310647000  | 1.063645000  | -0.021767000 | 1                                                                                          | 3.312342000  | 1.043603000  | -0.000231000 |
| 1                                                                                          | 1.853073000  | 1.616547000  | -0.873207000 | 1                                                                                          | 1.883457000  | 1.578931000  | -0.894334000 |
| 1                                                                                          | 1.885667000  | 1.562476000  | 0.928725000  | 1                                                                                          | 1.883723000  | 1.578890000  | 0.894269000  |
| 6                                                                                          | -0.434021000 | -0.329358000 | 0.124904000  | 6                                                                                          | -0.430128000 | -0.309438000 | -0.000567000 |
| 1                                                                                          | -0.350729000 | 0.196925000  | -0.824819000 | 1                                                                                          | -0.358533000 | 0.216230000  | -0.938658000 |
| 1                                                                                          | -0.664260000 | -1.390001000 | 0.133321000  | 1                                                                                          | -0.657809000 | -1.362606000 | -0.000761000 |
| 1                                                                                          | -0.363602000 | 0.200957000  | 1.067982000  | 1                                                                                          | -0.358321000 | 0.215920000  | 0.937708000  |
| 16                                                                                         | 1.700040000  | -0.660933000 | -0.039576000 | 16                                                                                         | 1.699555000  | -0.659873000 | -0.000052000 |
| 17                                                                                         | -2.561600000 | 0.168889000  | -0.033181000 | 17                                                                                         | -2.567575000 | 0.163565000  | 0.000401000  |

| <b>TS3</b>                                                                                 |              |              |              |                                                                                            |              |              |              |
|--------------------------------------------------------------------------------------------|--------------|--------------|--------------|--------------------------------------------------------------------------------------------|--------------|--------------|--------------|
| Total energy = -938.0566962 Hartrees<br>Nuclear repulsion energy = 211.2111176546 Hartrees |              |              |              | Total energy = -938.1233919 Hartrees<br>Nuclear repulsion energy = 213.1398342603 Hartrees |              |              |              |
| 6                                                                                          | 0.399975000  | 1.532546000  | 0.027350000  | 6                                                                                          | 0.393986000  | 1.533181000  | 0.029550000  |
| 1                                                                                          | -0.281045000 | 2.049828000  | -0.653833000 | 1                                                                                          | -0.284241000 | 2.046668000  | -0.645479000 |
| 1                                                                                          | 0.186926000  | 1.800905000  | 1.066447000  | 1                                                                                          | 0.177521000  | 1.799380000  | 1.060731000  |
| 1                                                                                          | 1.435142000  | 1.786402000  | -0.224657000 | 1                                                                                          | 1.421407000  | 1.792152000  | -0.215939000 |
| 6                                                                                          | 2.700575000  | -0.601513000 | 0.146448000  | 6                                                                                          | 2.655173000  | -0.608750000 | 0.145857000  |
| 1                                                                                          | 2.850961000  | 0.004608000  | 1.035816000  | 1                                                                                          | 2.815301000  | -0.065463000 | 1.064015000  |
| 1                                                                                          | 2.700881000  | -1.681013000 | 0.260873000  | 1                                                                                          | 2.656754000  | -1.685508000 | 0.195991000  |
| 1                                                                                          | 2.975955000  | -0.189661000 | -0.821823000 | 1                                                                                          | 2.960118000  | -0.149159000 | -0.782496000 |
| 17                                                                                         | -1.885888000 | -0.304811000 | 0.092795000  | 17                                                                                         | -1.862715000 | -0.309588000 | 0.091972000  |
| 16                                                                                         | 0.224249000  | -0.260968000 | -0.205195000 | 16                                                                                         | 0.226521000  | -0.251354000 | -0.205800000 |
| <b>MS1</b>                                                                                 |              |              |              |                                                                                            |              |              |              |
| Total energy = -938.0890949 Hartrees<br>Nuclear repulsion energy = 197.2804636077 Hartrees |              |              |              | Total energy = -938.1536389 Hartrees<br>Nuclear repulsion energy = 196.9792110223 Hartrees |              |              |              |
| 6                                                                                          | -0.600844000 | -1.268519000 | 0.567920000  | 6                                                                                          | -0.650912000 | -1.269677000 | 0.569526000  |
| 1                                                                                          | -0.488234000 | -0.990763000 | 1.615832000  | 1                                                                                          | -0.549950000 | -1.000665000 | 1.611926000  |
| 1                                                                                          | -0.562221000 | -2.319074000 | 0.288103000  | 1                                                                                          | -0.604482000 | -2.310280000 | 0.286636000  |
| 1                                                                                          | 1.185225000  | -0.554077000 | 0.113683000  | 1                                                                                          | 1.225788000  | -0.537743000 | 0.126478000  |
| 6                                                                                          | -1.306474000 | 1.345662000  | 0.371143000  | 6                                                                                          | -1.323561000 | 1.339411000  | 0.375138000  |
| 1                                                                                          | -1.865865000 | 2.088073000  | -0.205545000 | 1                                                                                          | -1.862100000 | 2.084615000  | -0.203390000 |
| 1                                                                                          | -1.720409000 | 1.275980000  | 1.382469000  | 1                                                                                          | -1.758690000 | 1.263078000  | 1.368835000  |
| 1                                                                                          | -0.246410000 | 1.618877000  | 0.401483000  | 1                                                                                          | -0.271724000 | 1.610012000  | 0.437397000  |
| 16                                                                                         | -1.495233000 | -0.246654000 | -0.479112000 | 16                                                                                         | -1.493163000 | -0.236989000 | -0.488968000 |
| 17                                                                                         | 2.297974000  | 0.139094000  | -0.092036000 | 17                                                                                         | 2.326977000  | 0.133200000  | -0.086610000 |
| <b>MS2</b>                                                                                 |              |              |              |                                                                                            |              |              |              |
| Total energy = -938.0933105 Hartrees<br>Nuclear repulsion energy = 177.6801638416 Hartrees |              |              |              | Total energy = -938.1577727 Hartrees<br>Nuclear repulsion energy = 177.8066283713 Hartrees |              |              |              |
| 6                                                                                          | 2.087911000  | 1.177245000  | -0.004398000 | 6                                                                                          | 2.139648000  | 1.170365000  | -0.001969000 |
| 1                                                                                          | 2.915688000  | 1.705687000  | -0.487479000 | 1                                                                                          | 2.964802000  | 1.665777000  | -0.507671000 |
| 1                                                                                          | 1.129656000  | 1.442119000  | -0.464270000 | 1                                                                                          | 1.185822000  | 1.468713000  | -0.431723000 |
| 1                                                                                          | 2.062759000  | 1.483458000  | 1.052525000  | 1                                                                                          | 2.156477000  | 1.477834000  | 1.046814000  |
| 6                                                                                          | -1.096289000 | -0.433190000 | 0.023940000  | 6                                                                                          | -1.115768000 | -0.433052000 | 0.034725000  |
| 1                                                                                          | -0.653495000 | -0.253277000 | -0.958184000 | 1                                                                                          | -0.658757000 | -0.247633000 | -0.931042000 |
| 1                                                                                          | -1.089966000 | -1.499893000 | 0.255121000  | 1                                                                                          | -1.114481000 | -1.494883000 | 0.252295000  |
| 1                                                                                          | -0.567332000 | 0.128260000  | 0.796801000  | 1                                                                                          | -0.591389000 | 0.110427000  | 0.812803000  |
| 16                                                                                         | 2.365373000  | -0.603853000 | -0.009458000 | 16                                                                                         | 2.351705000  | -0.609884000 | -0.012884000 |
| 17                                                                                         | -2.799589000 | 0.128881000  | -0.009437000 | 17                                                                                         | -2.806649000 | 0.138472000  | -0.013639000 |
| <b>MS3</b>                                                                                 |              |              |              |                                                                                            |              |              |              |
| Total energy = -938.058863 Hartrees<br>Nuclear repulsion energy = 208.6554333659 Hartrees  |              |              |              | Total energy = -938.1266003 Hartrees<br>Nuclear repulsion energy = 209.9883899044 Hartrees |              |              |              |
| 6                                                                                          | -0.169575000 | 1.580836000  | 0.734965000  | 6                                                                                          | -0.298071000 | 1.572905000  | 0.715064000  |
| 1                                                                                          | -0.845528000 | 1.504399000  | 1.591400000  | 1                                                                                          | -0.942979000 | 1.448581000  | 1.580466000  |
| 1                                                                                          | 0.852205000  | 1.287544000  | 0.997328000  | 1                                                                                          | 0.740748000  | 1.367465000  | 0.962400000  |
| 1                                                                                          | -0.173393000 | 2.609543000  | 0.351075000  | 1                                                                                          | -0.391913000 | 2.588045000  | 0.328793000  |
| 6                                                                                          | 2.778341000  | -0.239369000 | -0.161308000 | 6                                                                                          | 2.786392000  | -0.075315000 | -0.166183000 |
| 1                                                                                          | 2.672052000  | -1.020203000 | 0.584507000  | 1                                                                                          | 2.842617000  | -0.745770000 | 0.674647000  |
| 1                                                                                          | 2.189206000  | -0.281675000 | -1.071368000 | 1                                                                                          | 2.195231000  | -0.345348000 | -1.024729000 |
| 1                                                                                          | 3.545262000  | 0.520015000  | -0.044656000 | 1                                                                                          | 3.401431000  | 0.808933000  | -0.190058000 |
| 17                                                                                         | -0.678146000 | -1.283698000 | 0.257760000  | 17                                                                                         | -0.554849000 | -1.306544000 | 0.263712000  |
| 16                                                                                         | -0.772745000 | 0.572152000  | -0.639510000 | 16                                                                                         | -0.833914000 | 0.506487000  | -0.631744000 |
| <b>RC1</b>                                                                                 |              |              |              |                                                                                            |              |              |              |
| Not located                                                                                |              |              |              | Total energy = -938.1503895 Hartrees<br>Nuclear repulsion energy = 202.1276913837 Hartrees |              |              |              |



|                                                                                            |                                                                                            |              |              |              |              |              |              |
|--------------------------------------------------------------------------------------------|--------------------------------------------------------------------------------------------|--------------|--------------|--------------|--------------|--------------|--------------|
|                                                                                            | 6                                                                                          | -0.261849000 | -1.129392000 | 0.537158000  |              |              |              |
|                                                                                            | 1                                                                                          | -0.284411000 | -0.898265000 | 1.599258000  |              |              |              |
|                                                                                            | 1                                                                                          | -0.181749000 | -2.188044000 | 0.314868000  |              |              |              |
|                                                                                            | 1                                                                                          | 0.835077000  | -0.616901000 | 0.193636000  |              |              |              |
|                                                                                            | 6                                                                                          | -1.397645000 | 1.301142000  | 0.305162000  |              |              |              |
|                                                                                            | 1                                                                                          | -2.098807000 | 1.928787000  | -0.236977000 |              |              |              |
|                                                                                            | 1                                                                                          | -1.665476000 | 1.267037000  | 1.358697000  |              |              |              |
|                                                                                            | 1                                                                                          | -0.382639000 | 1.677994000  | 0.182358000  |              |              |              |
|                                                                                            | 16                                                                                         | -1.477523000 | -0.350893000 | -0.411462000 |              |              |              |
|                                                                                            | 17                                                                                         | 2.198549000  | 0.200775000  | -0.110728000 |              |              |              |
| <b>RC2</b>                                                                                 |                                                                                            |              |              |              |              |              |              |
| Not located                                                                                | Total energy = -938.1392506 Hartrees<br>Nuclear repulsion energy = 175.4514992408 Hartrees |              |              |              |              |              |              |
|                                                                                            | 6                                                                                          | -2.456344000 | 1.136087000  | -0.000005000 |              |              |              |
|                                                                                            | 1                                                                                          | -3.541797000 | 1.197077000  | 0.000067000  |              |              |              |
|                                                                                            | 1                                                                                          | -2.071905000 | 1.629779000  | 0.890830000  |              |              |              |
|                                                                                            | 1                                                                                          | -2.072025000 | 1.629689000  | -0.890940000 |              |              |              |
|                                                                                            | 6                                                                                          | -0.215489000 | -0.432038000 | -0.000107000 |              |              |              |
|                                                                                            | 1                                                                                          | 0.120081000  | 0.099956000  | 0.889108000  |              |              |              |
|                                                                                            | 1                                                                                          | 0.216731000  | -1.429837000 | -0.000201000 |              |              |              |
|                                                                                            | 1                                                                                          | 0.119952000  | 0.100044000  | -0.889306000 |              |              |              |
|                                                                                            | 16                                                                                         | -2.011187000 | -0.613618000 | 0.000047000  |              |              |              |
|                                                                                            | 17                                                                                         | 3.261115000  | 0.139229000  | 0.000021000  |              |              |              |
| <b>CH<sub>3</sub>SCH<sub>2</sub></b>                                                       |                                                                                            |              |              |              |              |              |              |
| Total energy = -477.2930583 Hartrees<br>Nuclear repulsion energy = -477.2930583 Hartrees   | Total energy = -477.3376793 Hartrees<br>Nuclear repulsion energy = 104.4828631141 Hartrees |              |              |              |              |              |              |
| 6                                                                                          | -1.370533000                                                                               | 0.432250000  | -0.000052000 | 6            | -1.365228000 | 0.427332000  | 0.000128000  |
| 1                                                                                          | -2.240350000                                                                               | -0.231425000 | -0.000013000 | 1            | -2.228066000 | -0.232949000 | -0.000078000 |
| 1                                                                                          | -1.385488000                                                                               | 1.056240000  | 0.899607000  | 1            | -1.382111000 | 1.048330000  | 0.892628000  |
| 1                                                                                          | -1.385432000                                                                               | 1.056081000  | -0.899820000 | 1            | -1.382144000 | 1.048818000  | -0.892036000 |
| 16                                                                                         | 0.108964000                                                                                | -0.615561000 | 0.000054000  | 16           | 0.110225000  | -0.610654000 | -0.000150000 |
| 6                                                                                          | 1.339118000                                                                                | 0.581903000  | -0.000170000 | 6            | 1.330561000  | 0.578079000  | 0.000655000  |
| 1                                                                                          | 1.086045000                                                                                | 1.637804000  | 0.000841000  | 1            | 1.081781000  | 1.626525000  | -0.002596000 |
| 1                                                                                          | 2.370293000                                                                                | 0.245361000  | -0.000145000 | 1            | 2.354930000  | 0.247278000  | -0.000208000 |
| <b>CH<sub>3</sub>SCI</b>                                                                   |                                                                                            |              |              |              |              |              |              |
| Total energy = -898.2430669 Hartrees<br>Nuclear repulsion energy = 144.4760578812 Hartrees | Total energy = -898.2968244 Hartrees<br>Nuclear repulsion energy = 145.6429586951 Hartrees |              |              |              |              |              |              |
| 6                                                                                          | 1.579335000                                                                                | 0.717147000  | -0.000016000 | 6            | 1.574684000  | 0.706922000  | -0.000028000 |
| 1                                                                                          | 1.430196000                                                                                | 1.315248000  | -0.903747000 | 1            | 1.429097000  | 1.304160000  | -0.895847000 |
| 1                                                                                          | 1.430326000                                                                                | 1.315024000  | 0.903883000  | 1            | 1.429159000  | 1.303943000  | 0.895947000  |
| 1                                                                                          | 2.593442000                                                                                | 0.295943000  | -0.000140000 | 1            | 2.580133000  | 0.285438000  | -0.000110000 |
| 17                                                                                         | -1.334126000                                                                               | 0.253068000  | 0.000115000  | 17           | -1.321411000 | 0.254423000  | 0.000160000  |
| 16                                                                                         | 0.484386000                                                                                | -0.720703000 | -0.000116000 | 16           | 0.473593000  | -0.716266000 | -0.000159000 |
| <b>CH<sub>3</sub>S</b>                                                                     |                                                                                            |              |              |              |              |              |              |
| Total energy = -438.0167 Hartrees<br>Nuclear repulsion energy = 48.3214490152 Hartrees     | Total energy = -438.0482552 Hartrees<br>Nuclear repulsion energy = 48.5806745306 Hartrees  |              |              |              |              |              |              |
| 6                                                                                          | 1.109354000                                                                                | 0.000480000  | -0.008806000 | 6            | 1.104024000  | 0.000456000  | -0.008275000 |
| 1                                                                                          | 1.419947000                                                                                | -0.021995000 | 1.046593000  | 1            | 1.414520000  | -0.022413000 | 1.039130000  |
| 1                                                                                          | 1.506507000                                                                                | -0.894725000 | -0.498108000 | 1            | 1.498928000  | -0.886682000 | -0.496712000 |
| 1                                                                                          | 1.509741000                                                                                | 0.912153000  | -0.463323000 | 1            | 1.501925000  | 0.904751000  | -0.461022000 |
| 16                                                                                         | -0.693270000                                                                               | 0.000105000  | -0.002020000 | 16           | -0.689970000 | 0.000101000  | -0.001984000 |
| <b>CH<sub>3</sub></b>                                                                      |                                                                                            |              |              |              |              |              |              |
| Total energy = -39.8108334 Hartrees<br>Nuclear repulsion energy = 9.6241877794 Hartrees    | Total energy = -39.8253668 Hartrees<br>Nuclear repulsion energy = 9.6993683513 Hartrees    |              |              |              |              |              |              |
| 6                                                                                          | 0.000000000                                                                                | 0.000000000  | 0.000008000  | 6            | 0.000000000  | 0.000000000  | 0.000008000  |

|                                                                                           |              |              |              |                                                                                           |              |              |              |
|-------------------------------------------------------------------------------------------|--------------|--------------|--------------|-------------------------------------------------------------------------------------------|--------------|--------------|--------------|
| 1                                                                                         | 0.000000000  | 1.084949000  | -0.000017000 | 1                                                                                         | 0.000000000  | 1.076539000  | -0.000016000 |
| 1                                                                                         | 0.939593000  | -0.542474000 | -0.000017000 | 1                                                                                         | 0.932310000  | -0.538270000 | -0.000016000 |
| 1                                                                                         | -0.939593000 | -0.542474000 | -0.000017000 | 1                                                                                         | -0.932310000 | -0.538270000 | -0.000016000 |
| <b>CH<sub>3</sub>Cl</b>                                                                   |              |              |              |                                                                                           |              |              |              |
| Total energy = -500.0732053 Hartrees<br>Nuclear repulsion energy = 51.1619288801 Hartrees |              |              |              | Total energy = -500.1068852 Hartrees<br>Nuclear repulsion energy = 51.3952348439 Hartrees |              |              |              |
| 6                                                                                         | 0.000000000  | 0.000000000  | -1.130781000 | 6                                                                                         | 0.000000000  | 0.000000000  | -1.126022000 |
| 1                                                                                         | 0.000000000  | 1.037712000  | -1.470870000 | 1                                                                                         | 0.000000000  | 1.028979000  | -1.467441000 |
| 1                                                                                         | -0.898685000 | -0.518856000 | -1.470870000 | 1                                                                                         | -0.891122000 | -0.514490000 | -1.467441000 |
| 1                                                                                         | 0.898685000  | -0.518856000 | -1.470870000 | 1                                                                                         | 0.891122000  | -0.514490000 | -1.467441000 |
| 17                                                                                        | 0.000000000  | 0.000000000  | 0.658665000  | 17                                                                                        | 0.000000000  | 0.000000000  | 0.656380000  |
| <b>HCl</b>                                                                                |              |              |              |                                                                                           |              |              |              |
| Total energy = -460.7865311 Hartrees<br>Nuclear repulsion energy = 6.9770492095 Hartrees  |              |              |              | Total energy = -460.8074726 Hartrees<br>Nuclear repulsion energy = 7.0355215280 Hartrees  |              |              |              |
| 17                                                                                        | 0.000000000  | 0.000000000  | 0.071632000  | 17                                                                                        | 0.000000000  | 0.000000000  | 0.071036000  |
| 1                                                                                         | 0.000000000  | 0.000000000  | -1.217740000 | 1                                                                                         | 0.000000000  | 0.000000000  | -1.207620000 |

**Cartesian coordinates for all stationary points for the DMS + Cl + H<sub>2</sub>O using the UM06-2X/aVTZ method.**

| <b>DMS•H<sub>2</sub>O</b>                          |              |              |              |
|----------------------------------------------------|--------------|--------------|--------------|
| Total energy = -554.4366248 Hartrees               |              |              |              |
| Nuclear repulsion energy = 175.0412177806 Hartrees |              |              |              |
| 16                                                 | 0.644375000  | 0.786118000  | 0.000000000  |
| 6                                                  | -0.528486000 | 0.631366000  | 1.367783000  |
| 1                                                  | 0.038586000  | 0.695968000  | 2.292916000  |
| 1                                                  | -1.252749000 | 1.442697000  | 1.334584000  |
| 1                                                  | -1.034140000 | -0.331270000 | 1.319595000  |
| 6                                                  | -0.528486000 | 0.631366000  | -1.367783000 |
| 1                                                  | -1.252749000 | 1.442697000  | -1.334584000 |
| 1                                                  | 0.038586000  | 0.695968000  | -2.292916000 |
| 1                                                  | -1.034140000 | -0.331270000 | -1.319595000 |
| 1                                                  | 0.547916000  | -1.623296000 | 0.000000000  |
| 8                                                  | -0.063148000 | -2.373284000 | 0.000000000  |
| 1                                                  | 0.485704000  | -3.159496000 | 0.000000000  |
| <b>DMS •H<sub>2</sub>O•Cl-1</b>                    |              |              |              |
| Total energy = -1014.6131482 Hartrees              |              |              |              |
| Nuclear repulsion energy = 296.1481993766 Hartrees |              |              |              |
| 16                                                 | 0.077015000  | -0.000011000 | -0.522956000 |
| 6                                                  | 0.369003000  | 1.373063000  | 0.599237000  |
| 1                                                  | 0.135267000  | 2.285508000  | 0.057954000  |
| 1                                                  | -0.301443000 | 1.270573000  | 1.448623000  |
| 1                                                  | 1.414082000  | 1.360920000  | 0.901125000  |
| 6                                                  | 0.369034000  | -1.373182000 | 0.599160000  |
| 1                                                  | -0.301396000 | -1.270767000 | 1.448568000  |
| 1                                                  | 0.135298000  | -2.285580000 | 0.057798000  |
| 1                                                  | 1.414148000  | -1.361073000 | 0.901044000  |
| 1                                                  | 2.860718000  | 0.000014000  | -0.981947000 |
| 8                                                  | 3.284743000  | -0.000139000 | -0.118836000 |
| 1                                                  | 4.229246000  | 0.001563000  | -0.289880000 |
| 17                                                 | -2.442607000 | 0.000050000  | -0.083276000 |
| <b>DMS•H<sub>2</sub>O•Cl-2</b>                     |              |              |              |
| Total energy = -1014.6201494 Hartrees              |              |              |              |
| Nuclear repulsion energy = 304.5838387149 Hartrees |              |              |              |
| 6                                                  | -0.963329000 | 0.734740000  | 1.381693000  |
| 1                                                  | -0.959251000 | 0.121397000  | 2.278318000  |
| 1                                                  | 0.008362000  | 1.200800000  | 1.234943000  |
| 1                                                  | -1.750229000 | 1.484153000  | 1.443713000  |
| 6                                                  | -0.963263000 | 0.734835000  | -1.381656000 |
| 1                                                  | -1.750405000 | 1.483971000  | -1.443944000 |
| 1                                                  | 0.008215000  | 1.201241000  | -1.234604000 |
| 1                                                  | -0.958675000 | 0.121476000  | -2.278268000 |
| 17                                                 | 1.045831000  | -1.423895000 | -0.000010000 |
| 16                                                 | -1.307535000 | -0.362796000 | -0.000025000 |
| 1                                                  | 2.832924000  | 1.910348000  | 0.000637000  |
| 8                                                  | 1.916874000  | 1.626697000  | -0.000038000 |
| 1                                                  | 1.935056000  | 0.656537000  | -0.000140000 |
| <b>DMS•H<sub>2</sub>O•Cl-3</b>                     |              |              |              |
| Total energy = -1014.6201494 Hartrees              |              |              |              |
| Nuclear repulsion energy = 290.9616313619 Hartrees |              |              |              |
| 6                                                  | -1.486329000 | 0.562009000  | 1.108543000  |
| 1                                                  | -1.922546000 | 1.549203000  | 0.997533000  |

|                                                    |              |              |              |
|----------------------------------------------------|--------------|--------------|--------------|
| 1                                                  | -2.028153000 | -0.025570000 | 1.846197000  |
| 1                                                  | -0.437642000 | 0.664857000  | 1.382609000  |
| 6                                                  | -0.553796000 | -1.605460000 | -0.198860000 |
| 1                                                  | -0.669475000 | -2.060398000 | 0.781850000  |
| 1                                                  | -0.566169000 | -2.313193000 | -1.020646000 |
| 1                                                  | 0.601964000  | -1.156915000 | -0.133379000 |
| 16                                                 | -1.569016000 | -0.246635000 | -0.496234000 |
| 17                                                 | 2.129004000  | -0.522623000 | 0.157342000  |
| 8                                                  | 0.516128000  | 2.256812000  | -0.347874000 |
| 1                                                  | 0.893651000  | 2.848398000  | -1.001525000 |
| 1                                                  | 1.151282000  | 1.530580000  | -0.262809000 |
| <b>DMS•H<sub>2</sub>O•Cl-4</b>                     |              |              |              |
| Total energy =-1014.6192737 Hartrees               |              |              |              |
| Nuclear repulsion energy = 305.2521035578 Hartrees |              |              |              |
| 6                                                  | 0.331038000  | -1.413086000 | 0.964569000  |
| 1                                                  | 0.385932000  | -0.712302000 | 1.794096000  |
| 1                                                  | -0.673124000 | -1.817970000 | 0.878056000  |
| 1                                                  | 1.064961000  | -2.209310000 | 1.073358000  |
| 17                                                 | -0.546850000 | 1.620348000  | 0.234973000  |
| 16                                                 | 0.653654000  | -0.522802000 | -0.561751000 |
| 6                                                  | 2.263103000  | 0.177963000  | -0.175859000 |
| 1                                                  | 2.525129000  | 0.850938000  | -0.987274000 |
| 1                                                  | 2.191341000  | 0.736134000  | 0.753986000  |
| 1                                                  | 2.997288000  | -0.621644000 | -0.099253000 |
| 8                                                  | -2.478382000 | -0.897593000 | -0.269833000 |
| 1                                                  | -3.213508000 | -0.824854000 | -0.881138000 |
| 1                                                  | -2.177820000 | 0.009401000  | -0.111945000 |
| <b>DMS•H<sub>2</sub>O•Cl-2</b>                     |              |              |              |
| Total energy =-1014.6201494 Hartrees               |              |              |              |
| Nuclear repulsion energy = 304.5750557510 Hartrees |              |              |              |
| 6                                                  | -0.963322000 | -0.734639000 | 1.381685000  |
| 1                                                  | -0.958445000 | -0.121237000 | 2.278267000  |
| 1                                                  | -1.750567000 | -1.483649000 | 1.444194000  |
| 1                                                  | 0.008043000  | -1.201182000 | 1.234388000  |
| 17                                                 | 1.046165000  | 1.423791000  | -0.000055000 |
| 8                                                  | 1.916671000  | -1.626956000 | 0.000031000  |
| 1                                                  | 1.935101000  | -0.656753000 | 0.000032000  |
| 1                                                  | 2.832656000  | -1.910814000 | -0.000476000 |
| 16                                                 | -1.307619000 | 0.362959000  | 0.000035000  |
| 6                                                  | -0.963548000 | -0.734717000 | -1.381620000 |
| 1                                                  | -0.959400000 | -0.121442000 | -2.278293000 |
| 1                                                  | 0.008092000  | -1.200881000 | -1.234788000 |
| 1                                                  | -1.750523000 | -1.484055000 | -1.443595000 |
| <b>TS1•H<sub>2</sub>O-A</b>                        |              |              |              |
| Total energy =-1014.5808168 Hartrees               |              |              |              |
| Nuclear repulsion energy = 281.4141230649 Hartrees |              |              |              |
| 16                                                 | -0.450828000 | 0.258283000  | -0.945235000 |
| 6                                                  | -0.168966000 | -1.230752000 | -0.030737000 |
| 1                                                  | -0.231424000 | -2.080036000 | -0.704992000 |
| 1                                                  | 0.866934000  | -1.164235000 | 0.379619000  |
| 1                                                  | -0.879553000 | -1.321560000 | 0.789129000  |
| 6                                                  | -0.495196000 | 1.415544000  | 0.431756000  |
| 1                                                  | 0.452897000  | 1.336189000  | 0.963899000  |
| 1                                                  | -0.612172000 | 2.415372000  | 0.023661000  |
| 1                                                  | -1.331216000 | 1.169851000  | 1.083733000  |
| 1                                                  | -3.024586000 | -0.231298000 | -0.308433000 |
| 8                                                  | -3.262532000 | -0.354204000 | 0.615852000  |

|                                                    |              |              |              |
|----------------------------------------------------|--------------|--------------|--------------|
| 1                                                  | -4.208541000 | -0.514261000 | 0.627165000  |
| 17                                                 | 2.721537000  | -0.118687000 | 0.290415000  |
| <b>TS1•H<sub>2</sub>O-B</b>                        |              |              |              |
| Total energy =-1014.5870086 Hartrees               |              |              |              |
| Nuclear repulsion energy = 280.9115148779 Hartrees |              |              |              |
| 16                                                 | -0.654209000 | 0.921997000  | -0.733640000 |
| 6                                                  | 0.031635000  | -0.657744000 | -0.786292000 |
| 1                                                  | 0.121544000  | -1.046556000 | -1.794509000 |
| 1                                                  | 1.281016000  | -0.525157000 | -0.364098000 |
| 1                                                  | -0.357317000 | -1.357997000 | -0.051776000 |
| 6                                                  | -0.722722000 | 1.156979000  | 1.054960000  |
| 1                                                  | 0.291824000  | 1.088886000  | 1.444599000  |
| 1                                                  | -1.129248000 | 2.147376000  | 1.238530000  |
| 1                                                  | -1.363290000 | 0.395435000  | 1.492814000  |
| 1                                                  | -2.945908000 | -0.661634000 | -0.359028000 |
| 8                                                  | -2.907984000 | -1.184273000 | 0.447303000  |
| 1                                                  | -3.745633000 | -1.649438000 | 0.500254000  |
| 17                                                 | 2.689691000  | -0.392006000 | 0.261236000  |
| <b>TS1•H<sub>2</sub>O-C</b>                        |              |              |              |
| Total energy =-1014.5731679 Hartrees               |              |              |              |
| Nuclear repulsion energy = 301.9492810067 Hartrees |              |              |              |
| 6                                                  | -1.237574000 | -1.198373000 | 0.956797000  |
| 1                                                  | -0.975734000 | -2.226964000 | 0.729824000  |
| 1                                                  | -0.456357000 | -0.765122000 | 1.575022000  |
| 1                                                  | -2.214940000 | -1.134441000 | 1.430434000  |
| 6                                                  | -1.337682000 | 1.316731000  | -0.086818000 |
| 1                                                  | -1.817365000 | 1.475433000  | 0.875128000  |
| 1                                                  | -0.010023000 | 1.641053000  | 0.173053000  |
| 1                                                  | -1.669613000 | 1.980939000  | -0.877680000 |
| 17                                                 | 1.799426000  | -0.839860000 | -0.188830000 |
| 16                                                 | -1.282004000 | -0.311885000 | -0.606636000 |
| 1                                                  | 1.596597000  | 2.383273000  | -0.177055000 |
| 8                                                  | 1.173249000  | 1.799561000  | 0.463308000  |
| 1                                                  | 1.534793000  | 0.806959000  | 0.261209000  |
| <b>TS2•H<sub>2</sub>O-A</b>                        |              |              |              |
| Total energy =-1014.5544117 Hartrees               |              |              |              |
| Nuclear repulsion energy = 279.0952866164 Hartrees |              |              |              |
| 6                                                  | -2.203529000 | 0.732251000  | 0.641184000  |
| 1                                                  | -3.217963000 | 1.069424000  | 0.434565000  |
| 1                                                  | -2.093909000 | 0.510854000  | 1.699842000  |
| 1                                                  | -1.506556000 | 1.515453000  | 0.344738000  |
| 6                                                  | 0.189390000  | -0.906809000 | 0.033265000  |
| 1                                                  | 0.112142000  | -0.913362000 | 1.106020000  |
| 1                                                  | 0.319522000  | -1.845208000 | -0.478016000 |
| 1                                                  | 0.210466000  | 0.029942000  | -0.518070000 |
| 16                                                 | -1.914766000 | -0.729575000 | -0.365657000 |
| 17                                                 | 2.371092000  | -0.565733000 | 0.135988000  |
| 8                                                  | 0.750745000  | 2.177831000  | -0.271697000 |
| 1                                                  | 1.039282000  | 2.888359000  | -0.848101000 |
| 1                                                  | 1.543571000  | 1.659900000  | -0.075393000 |
| <b>TS2•H<sub>2</sub>O-B</b>                        |              |              |              |
| Total energy =-1014.5185919 Hartrees               |              |              |              |
| Nuclear repulsion energy = 298.5121161761 Hartrees |              |              |              |
| 6                                                  | -0.357564000 | 0.245903000  | 1.634175000  |
| 1                                                  | -0.725106000 | 1.230247000  | 1.864938000  |
| 1                                                  | -1.114598000 | -0.521154000 | 1.557347000  |

|                                                    |              |              |              |
|----------------------------------------------------|--------------|--------------|--------------|
| 1                                                  | 0.551170000  | -0.016921000 | 2.153640000  |
| 17                                                 | -0.361821000 | 1.444953000  | -0.425827000 |
| 16                                                 | 0.764158000  | -0.983306000 | -0.154708000 |
| 6                                                  | 2.368822000  | -0.173509000 | -0.206195000 |
| 1                                                  | 2.429650000  | 0.474797000  | -1.076052000 |
| 1                                                  | 2.542606000  | 0.409133000  | 0.696496000  |
| 1                                                  | 3.122743000  | -0.956952000 | -0.278106000 |
| 8                                                  | -2.534541000 | -1.003526000 | -0.268432000 |
| 1                                                  | -2.572248000 | -1.634665000 | -0.989828000 |
| 1                                                  | -2.101000000 | -0.221940000 | -0.634467000 |
| <b>TS2•H<sub>2</sub>O-C</b>                        |              |              |              |
| Total energy =-1014.5194601 Hartrees               |              |              |              |
| Nuclear repulsion energy = 298.4762291786 Hartrees |              |              |              |
| 6                                                  | -0.290027000 | -0.687752000 | 1.520735000  |
| 1                                                  | -1.170877000 | -1.300955000 | 1.447235000  |
| 1                                                  | 0.494762000  | -1.113053000 | 2.125837000  |
| 1                                                  | -0.492888000 | 0.364322000  | 1.654679000  |
| 17                                                 | -0.507803000 | -1.248458000 | -0.784547000 |
| 8                                                  | -2.300084000 | 1.234655000  | 0.211937000  |
| 1                                                  | -1.993566000 | 0.505647000  | -0.344898000 |
| 1                                                  | -3.101191000 | 1.564124000  | -0.199732000 |
| 16                                                 | 1.643439000  | 0.041447000  | 0.205033000  |
| 6                                                  | 1.008610000  | 1.541342000  | -0.554853000 |
| 1                                                  | 0.852941000  | 1.376544000  | -1.618092000 |
| 1                                                  | 0.074482000  | 1.850972000  | -0.089539000 |
| 1                                                  | 1.763148000  | 2.314260000  | -0.409509000 |
| <b>MS1•H<sub>2</sub>O-1</b>                        |              |              |              |
| Total energy =-1014.5904155 Hartrees               |              |              |              |
| Nuclear repulsion energy = 274.1733118329 Hartrees |              |              |              |
| 6                                                  | 0.252622000  | -1.048594000 | 0.597067000  |
| 1                                                  | 0.475311000  | -1.448410000 | -0.382674000 |
| 1                                                  | 0.174115000  | -1.716674000 | 1.441208000  |
| 1                                                  | -1.747977000 | -0.657630000 | 0.110316000  |
| 6                                                  | 0.632908000  | 1.289471000  | -0.712346000 |
| 1                                                  | 0.921856000  | 2.331974000  | -0.612681000 |
| 1                                                  | 1.349380000  | 0.763875000  | -1.338857000 |
| 1                                                  | -0.373307000 | 1.222269000  | -1.119499000 |
| 16                                                 | 0.651245000  | 0.573701000  | 0.947825000  |
| 17                                                 | -2.896145000 | -0.233502000 | -0.337464000 |
| 1                                                  | 2.927991000  | -0.530646000 | 0.125456000  |
| 8                                                  | 3.205869000  | -0.706366000 | -0.779287000 |
| 1                                                  | 4.127050000  | -0.968761000 | -0.725624000 |
| <b>MS1•H<sub>2</sub>O-2</b>                        |              |              |              |
| Total energy =-1014.5955419 Hartrees               |              |              |              |
| Nuclear repulsion energy = 283.8617183630 Hartrees |              |              |              |
| 6                                                  | -0.764154000 | -1.053724000 | 1.123328000  |
| 1                                                  | -0.091026000 | -1.900971000 | 1.031968000  |
| 1                                                  | -0.215002000 | -0.202561000 | 1.520135000  |
| 1                                                  | -1.602922000 | -1.306135000 | 1.767552000  |
| 6                                                  | -2.298398000 | 0.717612000  | -0.232535000 |
| 1                                                  | -2.633811000 | 0.931508000  | 0.772073000  |
| 1                                                  | -0.369965000 | 1.803250000  | 0.006310000  |
| 1                                                  | -2.835321000 | 1.130420000  | -1.072424000 |
| 17                                                 | 2.435088000  | -0.409675000 | -0.218292000 |
| 16                                                 | -1.363315000 | -0.673118000 | -0.536962000 |
| 1                                                  | 0.767132000  | 2.853203000  | 0.053338000  |
| 8                                                  | 0.515646000  | 1.979149000  | 0.360795000  |

|                                                     |              |              |              |
|-----------------------------------------------------|--------------|--------------|--------------|
| 1                                                   | 1.647612000  | 0.609128000  | -0.007715000 |
| <b>MS2•H<sub>2</sub>O-1</b>                         |              |              |              |
| Total energy = -1014.6002765 Hartrees               |              |              |              |
| Nuclear repulsion energy = 282.5068567880 Hartrees  |              |              |              |
| 6                                                   | -2.240493000 | -0.130973000 | 0.838840000  |
| 1                                                   | -3.308930000 | 0.022601000  | 0.670127000  |
| 1                                                   | -2.120311000 | -0.904756000 | 1.592778000  |
| 1                                                   | -1.805070000 | 0.811422000  | 1.164528000  |
| 6                                                   | 1.286139000  | -0.563427000 | 1.189152000  |
| 1                                                   | 0.637508000  | 0.286594000  | 1.376882000  |
| 1                                                   | 2.079185000  | -0.621240000 | 1.925941000  |
| 1                                                   | 0.720957000  | -1.489423000 | 1.159610000  |
| 16                                                  | -1.551661000 | -0.640935000 | -0.739477000 |
| 17                                                  | 2.035308000  | -0.325124000 | -0.415867000 |
| 8                                                   | -0.078267000 | 2.246254000  | -0.029709000 |
| 1                                                   | -0.478998000 | 1.630654000  | -0.656415000 |
| 1                                                   | 0.854261000  | 2.242584000  | -0.262366000 |
| <b>MS2•H<sub>2</sub>O-2</b>                         |              |              |              |
| Total energy = -1014.6009738 Hartrees               |              |              |              |
| Nuclear repulsion energy = 285.2448930031 Hartrees  |              |              |              |
| 6                                                   | 1.923092000  | -0.254520000 | 1.001280000  |
| 1                                                   | 2.998892000  | -0.340992000 | 1.099053000  |
| 1                                                   | 1.588190000  | 0.754191000  | 1.219353000  |
| 1                                                   | 1.416060000  | -0.979380000 | 1.628306000  |
| 17                                                  | 1.498611000  | -0.613183000 | -0.701727000 |
| 16                                                  | -1.557630000 | -0.423296000 | 0.795216000  |
| 6                                                   | -2.052106000 | -0.393114000 | -0.929832000 |
| 1                                                   | -1.641229000 | 0.470305000  | -1.446895000 |
| 1                                                   | -1.761704000 | -1.317354000 | -1.422474000 |
| 1                                                   | -3.142047000 | -0.326684000 | -0.938518000 |
| 8                                                   | 0.090927000  | 2.398845000  | -0.122825000 |
| 1                                                   | -0.511847000 | 1.817739000  | 0.356959000  |
| 1                                                   | 0.546030000  | 1.814058000  | -0.735974000 |
| <b>MS2•H<sub>2</sub>O-3</b>                         |              |              |              |
| Total energy = -1014.5983024 Hartrees               |              |              |              |
| Nuclear repulsion energy = 280.6655161220 Hartrees  |              |              |              |
| 6                                                   | -1.126411000 | -1.016762000 | 1.079328000  |
| 1                                                   | -2.149534000 | -1.175150000 | 1.399673000  |
| 1                                                   | -0.473631000 | -1.811339000 | 1.419669000  |
| 1                                                   | -0.764253000 | -0.048725000 | 1.406539000  |
| 17                                                  | -1.107931000 | -1.032472000 | -0.714074000 |
| 8                                                   | -1.867270000 | 1.941022000  | 0.259893000  |
| 1                                                   | -1.892523000 | 1.262884000  | -0.424215000 |
| 1                                                   | -2.379495000 | 2.677715000  | -0.079199000 |
| 16                                                  | 2.151853000  | -0.336375000 | 0.182348000  |
| 6                                                   | 1.560078000  | 1.284824000  | -0.310334000 |
| 1                                                   | 1.503851000  | 1.369290000  | -1.392439000 |
| 1                                                   | 0.599242000  | 1.519758000  | 0.143270000  |
| 1                                                   | 2.297692000  | 2.003044000  | 0.055283000  |
| <b>CH<sub>3</sub>SCH<sub>2</sub>•H<sub>2</sub>O</b> |              |              |              |
| Total energy = -553.7759646 Hartrees                |              |              |              |
| Nuclear repulsion energy = 164.9440618870 Hartrees  |              |              |              |
| 16                                                  | 1.053062000  | -0.163655000 | -0.466642000 |
| 6                                                   | 0.295852000  | -1.316058000 | 0.535563000  |
| 1                                                   | 0.415847000  | -2.352142000 | 0.261864000  |
| 1                                                   | 0.023935000  | -1.054356000 | 1.547660000  |

|                                                    |              |              |              |
|----------------------------------------------------|--------------|--------------|--------------|
| 6                                                  | 0.627208000  | 1.367542000  | 0.392013000  |
| 1                                                  | 1.033773000  | 1.346933000  | 1.400375000  |
| 1                                                  | 1.079565000  | 2.182935000  | -0.165566000 |
| 1                                                  | -0.454028000 | 1.482363000  | 0.411662000  |
| 1                                                  | -1.778908000 | -0.522368000 | -0.059509000 |
| 8                                                  | -2.474580000 | 0.147432000  | -0.071923000 |
| 1                                                  | -2.910895000 | 0.046746000  | -0.920292000 |
| <b>HCl•H<sub>2</sub>O</b>                          |              |              |              |
| Total energy = -537.2463179 Hartrees               |              |              |              |
| Nuclear repulsion energy = 46.2018511188 Hartrees  |              |              |              |
| 17                                                 | -1.214515000 | -0.000006000 | 0.007308000  |
| 1                                                  | 0.078915000  | 0.000393000  | -0.070829000 |
| 8                                                  | 1.972394000  | 0.000031000  | -0.084238000 |
| 1                                                  | 2.393936000  | -0.767431000 | 0.310107000  |
| 1                                                  | 2.394755000  | 0.766898000  | 0.310388000  |
| <b>CH<sub>3</sub>Cl•H<sub>2</sub>O</b>             |              |              |              |
| Total energy = -576.5434844 Hartrees               |              |              |              |
| Nuclear repulsion energy = 103.1088565394 Hartrees |              |              |              |
| 6                                                  | 0.769266000  | 1.150709000  | -0.002075000 |
| 1                                                  | 1.275374000  | 1.525787000  | -0.883827000 |
| 1                                                  | 1.237927000  | 1.524893000  | 0.900490000  |
| 1                                                  | -0.287677000 | 1.391180000  | -0.023882000 |
| 17                                                 | 0.925331000  | -0.633746000 | 0.000146000  |
| 8                                                  | -2.246385000 | 0.057921000  | 0.008322000  |
| 1                                                  | -1.538119000 | -0.594834000 | 0.007328000  |
| 1                                                  | -3.062657000 | -0.440973000 | -0.056718000 |
| <b>CH<sub>3</sub>S•H<sub>2</sub>O</b>              |              |              |              |
| Total energy = -514.4860212 Hartrees               |              |              |              |
| Nuclear repulsion energy = 99.0927863671 Hartrees  |              |              |              |
| 6                                                  | 0.648593000  | 1.134093000  | -0.001137000 |
| 1                                                  | 0.074478000  | 1.352281000  | 0.900316000  |
| 1                                                  | 1.541726000  | 1.748659000  | -0.046387000 |
| 1                                                  | -0.014443000 | 1.341725000  | -0.841174000 |
| 16                                                 | 1.034774000  | -0.616988000 | -0.000414000 |
| 8                                                  | -2.204959000 | -0.021470000 | -0.000784000 |
| 1                                                  | -1.437562000 | -0.607270000 | 0.006813000  |
| 1                                                  | -2.972473000 | -0.596374000 | 0.000148000  |



### More detail on comparison of Figure 1 with Figures 4 and 5 (for Channel A) and Figure 1 with Figures 6 and 7 (for Channel B)

Inspection of Figure 1, Tables 1 and 2 shows that channels A, B and C' are exothermic. Channel B is the most exothermic but it has a significant energy barrier (see TS2 in Figure 1 at  $15.5 \text{ kcal.mol}^{-1}$  at the UM06-2X/aVTZ level). It was important, therefore, to determine if introducing water gave rise to a reduced energy barrier for channel B, the most exothermic channel. Hence, in this work DMS + Cl + H<sub>2</sub>O calculations only considered channels A, B and C' as channel C (which produces of CH<sub>3</sub>SCl + CH<sub>3</sub>) is endothermic ( $\Delta H_{f,298}^{\phi} = 8.05 \pm 1.66 \text{ kcal.mol}^{-1}$ ; Table 1).

The energy profiles computed at the UM06-2X/aVTZ level of channel A via pathways (a) (DMS•H<sub>2</sub>O + Cl) and (c) (DMS•Cl + H<sub>2</sub>O) are shown in Figures 4 and 5, respectively. As can be seen, in each case, the reaction proceeds via a number of energy minima as well as a submerged TS (TS1 in each case). The computed relative energies, enthalpies ( $\Delta H_{f,298K}^{\phi}$ ) and free energies ( $\Delta G_{f,298K}^{\phi}$ ) of these stationary points at the UM06-2X, UCCSD(T)/CBS//UM06-2X/aVTZ, and DLPNO-UCCSD(T)/CBS//UM06-2X/aVTZ levels are shown in Table 5. The lowest energy transition state in these figures is TS1.H<sub>2</sub>O-B. It is interesting to note that TS1•H<sub>2</sub>O-B (in Figure 4) has a very similar structure with similar geometrical parameters to TS1 (in Figure 1), indicating that the presence of the water molecule does not affect the transition state structure significantly (see the structures of TS1 and TS1•H<sub>2</sub>O-B in Figures 2 and 8 respectively). Their relative energies are also comparable ( $-8.9$  and  $-11.1 \text{ kcal.mol}^{-1}$  at the DLPNO-UCCSD(T)/CBS//UM06-2X/aVTZ level) with TS1•H<sub>2</sub>O-B lower than TS1 by  $2.2 \text{ kcal.mol}^{-1}$  and this can be explained by the additional stabilisation provided by the water molecule in TS1•H<sub>2</sub>O-B via the S---H and O---H hydrogen bonds.

The corresponding information for channel B is shown in Figures 6 and 7, and Table 6. The hydrated TSs along with their selected geometrical parameters are illustrated in Figure 8. On inspection of these figures, it is immediately obvious that Figures 6 and 7 have significant energy barriers, with the pathway via DMS•H<sub>2</sub>O + Cl (Figure 6) having a lower energy barrier than the pathway via DMS•Cl + H<sub>2</sub>O (Figure 7). In Figure 6, the relative energy of TS2•H<sub>2</sub>O-A is  $9.8 \text{ kcal.mol}^{-1}$  with the UM06-2X/aVTZ method and  $13.6 \text{ kcal.mol}^{-1}$  with the DLPNO-UCCSD(T)/CBS//UM06-2X/aVTZ method, and in Figure 7, the corresponding values for TS2•H<sub>2</sub>O-C are  $31.7$  (UM06-2X/aVTZ) and  $35.7 \text{ kcal.mol}^{-1}$  (DLPNO-UCCSD(T)/CBS//UM06-2X/aVTZ). This relative energy of TS2•H<sub>2</sub>O-A of  $13.6 \text{ kcal.mol}^{-1}$  compares with the relative energy of TS2 in channel B of the DMS + Cl reaction of  $18.3$

kcal.mol<sup>-1</sup>, both at the DLPNO-UCCSD(T)/CBS//UM06-2X/aVTZ level. TS2 and TS2•H2O-A also have similar structures with similar geometrical parameters for the CH<sub>3</sub>S---CH<sub>3</sub>—Cl units (see Figure S2 and Figure 8).

The hydrated form of DMS•Cl (adduct 1 formed in channel C' of the DMS + Cl reaction) can be formed via DMS•H<sub>2</sub>O reacting with Cl, as shown in Figure 4, and from DMS•Cl reacting with H<sub>2</sub>O, as shown in Figure 5. The hydrated form of adduct 1 formed from DMS•H<sub>2</sub>O + Cl (DMS•H<sub>2</sub>O•Cl-1 in Figure 4) has a relative energy of -26.0 kcal.mol<sup>-1</sup> at the UM06-2X/aVTZ level (-22.8 kcal.mol<sup>-1</sup> at the DLPNO-UCCSD(T)/CBS//UM06-2X/aVTZ level) (see Table 5). Formation of DMS•Cl•H<sub>2</sub>O via DMS•Cl is shown in Figure 5 and is denoted as DMS•H<sub>2</sub>O•Cl-2. This also occurs in Figure 7 (channel B, pathway (c)). It has relative energies of -29.9 and -26.5 kcal.mol<sup>-1</sup> at the UM06-2X/aVTZ and DLPNO-UCCSD(T)/CBS//UM06-2X/aVTZ levels, respectively (see Table 6).

Inspection of Tables 5 and 6 indicates that the relative energies calculated from the UM06-2X/aVTZ method are lower than the higher level CBS values (by less than 5 kcal.mol<sup>-1</sup>) except for MS1•H<sub>2</sub>O-1 and MS1•H<sub>2</sub>O-2 where the UM06-2X/aVTZ relative energies are slightly higher than the CBS values by ~1 kcal.mol<sup>-1</sup>. Also, the differences between the extrapolated UCCSD(T)/CBS and DLPNO-UCCSD(T)/CBS values are less than 1.5 kcal.mol<sup>-1</sup>. It is also worth pointing out that the T1 diagnostic value for each of the transition states is less than 0.02, the recommended upper limit to ensure low multireference character.
